# Supplementary material for: 3219 hospitalised patients with COVID-19 in Southeast Michigan: a retrospective case cohort study
Source: PubMed Central journal article supplement — BMJ Open. 2021 Apr 7;11(4):e042042. doi: 10.1136/bmjopen-2020-042042 (PMC8029036; doi:10.1136/bmjopen-2020-042042), 2021-04-07
Supplement: bmjopen-2020-042042.draft_revisions.pdf [file bmjopen-2020-042042.draft_revisions.pdf]

# BMJ Open

BMJ Open is committed to open peer review. As part of this commitment we make the peer review history of every article we publish publicly available.

When an article is published we post the peer reviewers' comments and the authors' responses online. We also post the versions of the paper that were used during peer review. These are the versions that the peer review comments apply to.

The versions of the paper that follow are the versions that were submitted during the peer review process. They are not the versions of record or the final published versions. They should not be cited or distributed as the published version of this manuscript.

BMJ Open is an open access journal and the full, final, typeset and author-corrected version of record of the manuscript is available on our site with no access controls, subscription charges or pay-per-view fees (<http://bmjopen.bmj.com>).

If you have any questions on BMJ Open's open peer review process please email [info.bmjopen@bmj.com](mailto:info.bmjopen@bmj.com)

# BMJ Open

## Clinical Characteristics and Outcomes Among 3219 Hospitalized Patients with COVID19 in Southeast Michigan

|                               |                                                                                                                                                                                                                                                                               |
|-------------------------------|-------------------------------------------------------------------------------------------------------------------------------------------------------------------------------------------------------------------------------------------------------------------------------|
| Journal:                      | <i>BMJ Open</i>                                                                                                                                                                                                                                                               |
| Manuscript ID                 | bmjopen-2020-042042                                                                                                                                                                                                                                                           |
| Article Type:                 | Original research                                                                                                                                                                                                                                                             |
| Date Submitted by the Author: | 23-Jun-2020                                                                                                                                                                                                                                                                   |
| Complete List of Authors:     | Mulhem, Elie; Oakland University William Beaumont School of Medicine, Family Medicine<br>Oleszkowicz, Andrew; Oakland University William Beaumont School of Medicine, Family Medicine<br>Lick, David; Oakland University William Beaumont School of Medicine, Family Medicine |
| Keywords:                     | INFECTIOUS DISEASES, Respiratory infections < THORACIC MEDICINE, Epidemiology < INFECTIOUS DISEASES                                                                                                                                                                           |
|                               |                                                                                                                                                                                                                                                                               |

SCHOLARONE™  
Manuscripts

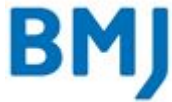

I, the Submitting Author has the right to grant and does grant on behalf of all authors of the Work (as defined in the below author licence), an exclusive licence and/or a non-exclusive licence for contributions from authors who are: i) UK Crown employees; ii) where BMJ has agreed a CC-BY licence shall apply, and/or iii) in accordance with the terms applicable for US Federal Government officers or employees acting as part of their official duties; on a worldwide, perpetual, irrevocable, royalty-free basis to BMJ Publishing Group Ltd ("BMJ") its licensees and where the relevant Journal is co-owned by BMJ to the co-owners of the Journal, to publish the Work in this journal and any other BMJ products and to exploit all rights, as set out in our [licence](#).

The Submitting Author accepts and understands that any supply made under these terms is made by BMJ to the Submitting Author unless you are acting as an employee on behalf of your employer or a postgraduate student of an affiliated institution which is paying any applicable article publishing charge ("APC") for Open Access articles. Where the Submitting Author wishes to make the Work available on an Open Access basis (and intends to pay the relevant APC), the terms of reuse of such Open Access shall be governed by a Creative Commons licence – details of these licences and which [Creative Commons](#) licence will apply to this Work are set out in our licence referred to above.

Other than as permitted in any relevant BMJ Author's Self Archiving Policies, I confirm this Work has not been accepted for publication elsewhere, is not being considered for publication elsewhere and does not duplicate material already published. I confirm all authors consent to publication of this Work and authorise the granting of this licence.

## Clinical Characteristics and Outcomes Among Hospitalized Patients with COVID19 in Southeast

### Michigan

Elie Mulhem (0000-0003-0194-2203), Andrew Oleszkowicz (0000-0001-9137-7337), David Lick (0000-0002-3164-6889)

Oakland University William Beaumont School of Medicine. Rochester, MI, USA Elie Mulhem, M.D.

Professor, Department of Family Medicine and Community Health, David Lick, M.D. Associate Professor,

Department of Family Medicine and Community Health, Andrew Oleszkowicz, M.D. Assistant Professor,

Department of Family Medicine and Community Health.

Corresponding Author: Elie Mulhem, M.D.

44250 Dequindre Road

Sterling Heights, MI 48314

[Elie.mulhem@beaumont.edu](mailto:Elie.mulhem@beaumont.edu)

Contributorship statement:

EM contributed to design of the study, data interpretation, drafting the article, critical revision and final approval of the manuscript

AO contributed to design of the study, data interpretation, drafting the article, critical revision and final approval of the manuscript

DL contributed to design of the study, data analysis and interpretation, drafting the article, critical revision and final approval of the manuscript

The corresponding author attests that all listed authors meet authorship criteria and that no others meeting the criteria have been omitted

1  
2  
3  
4  
5  
6  
7  
8  
9  
10  
11  
12  
13  
14  
15  
16  
17  
18  
19  
20  
21  
22  
23  
24  
25  
26  
27  
28  
29  
30  
31  
32  
33  
34  
35  
36  
37  
38  
39  
40  
41  
42  
43  
44  
45  
46  
47  
48  
49  
50  
51  
52  
53  
54  
55  
56  
57  
58  
59  
60

All authors declare no conflict of interest

Word count: 2543

For peer review only

## Clinical Characteristics and Outcomes Among 3219 Hospitalized Patients with COVID19 in Southeast

### Michigan

#### Abstract:

**Introduction:** There is limited information about the clinical characteristics and outcomes of patients hospitalized with COVID-19 in Southeast Michigan.

**Methods:** Retrospective cohort study included 3560 hospitalized patients with a positive SARS-CoV-2 infection by nasopharyngeal polymerase chain reaction (PCR) test from March 13 until April 29, 2020.

**Results:** During the study period 3,219 (90.4%) patients were discharged or died in the hospital. Median age was 65.2 (IQR 52.6 to 77.2) years, median length of stay in the hospital was 6.0 (IQR 3.2 to 10.1) days, and 51% were females. Hypertension was the most common chronic diseases occurring in 2,386 (74.1%) patients, followed by obesity in 1,642 (51.0%) patients. Overall mortality rate was 16.0%. Blacks represented 52.3% of the patients and had a mortality rate of 13.5%. Mortality was highest at 18.5% in the pre-peak hospital COVID-19 volume, decreasing to 15.3% during the peak period and to 10.8% in the post-peak period. Multivariable regression showed increasing odds of in-hospital death associated with older age (odds ratio 1.04, 95% CI 1.03 to 1.05;  $p < 0.001$ ) for every increase in year of age and being male (1.47 (95% CI 1.21 to 1.81;  $p < 0.001$ ). Chronic kidney disease, diabetes mellitus, heart failure, and obesity increased the odds of in-hospital mortality. Administration of hydroxychloroquine, azithromycin, therapeutic heparin, and systemic steroids in the hospital were associated with higher odds of death.

**Discussion:** In-hospital mortality was highest in early admissions and significantly improved as our knowledge and experience in treating COVID-19 patients increased. Black patients were more likely to get admitted to the hospital, and to receive mechanical ventilation, but less likely to die in the hospital

1  
2  
3  
4  
5  
6  
7  
8  
9  
10  
11  
12  
13  
14  
15  
16  
17  
18  
19  
20  
21  
22  
23  
24  
25  
26  
27  
28  
29  
30  
31  
32  
33  
34  
35  
36  
37  
38  
39  
40  
41  
42  
43  
44  
45  
46  
47  
48  
49  
50  
51  
52  
53  
54  
55  
56  
57  
58  
59  
60

than Whites. Age, male sex, chronic kidney disease were found to increase the odds of in-hospital mortality.

For peer review only

**Article Summary:**

Patients hospitalized with COVID-19 in Southeast Michigan have a higher prevalence of comorbid conditions but lower mortality than other areas of the United States.

Chronic kidney disease, diabetes mellitus, heart failure, and obesity increased the odds of in-hospital mortality but hypertension did not

Mortality in patients with COVID-19 decreased significantly over time as therapies evolved and clinicians gained experience with the disease

Blacks were hospitalized and mechanically ventilated more often than Whites but had a lower in-hospital mortality rate



1  
2  
3 Coronavirus disease 2019 (COVID-19) was first reported as an outbreak of pneumonia of unknown cause  
4  
5 in Wuhan, China in December 2019.[1] The virus responsible was subsequently named severe acute  
6  
7 respiratory syndrome coronavirus 2 (SARS-CoV-2). The first confirmed case in the United States was  
8  
9 reported January 31, 2020, and the first case in Michigan was reported March 10, 2020 [2]. As of June 1,  
10  
11 2020, 57,532 cases were confirmed in Michigan with 5,516 attributed deaths [2]. Southeast Michigan  
12  
13 has been the epicenter of COVID-19 in the state [2].  
14  
15

16  
17 As the pandemic spread, clinical characteristics of hospitalized COVID-19 patients were described in the  
18  
19 medical literature from around the world, including China[3], Italy[4] New York City[5] and others. In this  
20  
21 report we aim to describe the clinical characteristics of patients hospitalized with COVID-19 in Southeast  
22  
23 Michigan, comparing those who did not survive hospitalization with those who were discharged alive  
24  
25 between March 13, 2020 and April 29, 2020. We also report overall mortality rates during three periods  
26  
27 of the COVID-19 surge, before, during and after the peak of COVID-19 hospital volumes.  
28  
29

### 30 31 **Methods:** 32

33  
34 This study was conducted at an eight-hospital health system in Southeast Michigan. The study was  
35  
36 approved by the Institutional Review Board. Patients were included in the study if they tested positive  
37  
38 for SARS-CoV-2 infection by nasopharyngeal polymerase chain reaction (PCR) test and were admitted to  
39  
40 one of the eight hospitals between March 13, 2020 and April 29, 2020. Data were collected  
41  
42 retrospectively from the electronic health record (Epic). Data collected included date of admission and  
43  
44 discharge, patient demographics, home medications, common chronic medical conditions, inpatient  
45  
46 medications received for treatment of COVID19, oxygen therapy, and status at time of discharge from  
47  
48 the hospital. Data were available for all patients during the study period. Patients who were still  
49  
50 admitted at the end of the study period were not included in data analysis.  
51  
52  
53  
54  
55  
56  
57  
58  
59  
60

1  
2  
3 Race and ethnicity were available by self-reported status in the electronic health record (EHR). Home  
4 medications of interest were assessed based on medication reconciliation by the attending physician at  
5 the time of admission. Inpatient medications of interest were obtained from the medication  
6 administration record. Chronic medical conditions assessed include diabetes mellitus (DM),  
7 hypertension (HTN), heart failure (HF), coronary artery disease (CAD), chronic kidney disease (CKD),  
8 obesity (BMI  $\geq 30$ ), asthma, and chronic obstructive pulmonary disease (COPD). Documentation of these  
9 conditions in the medical history, problem list before admission, problem list during the admission, or  
10 discharge diagnoses in the EHR was used to evaluate the presence of these conditions. Patients were  
11 grouped as living or deceased based on status at the time of discharge from the hospital.  
12  
13

14  
15 To evaluate the change in risk of mortality during the study, three periods were created: pre-peak, peak,  
16 and post-peak hospital COVID-19 volume. These periods were March 13 to March 30, 2020, March 31 to  
17 April 13, 2020, and April 14 to April 29, 2020. Peak was defined as the two-week period when the  
18 maximum number patients were admitted to the hospital system with a diagnosis of COVID-19.  
19  
20

21  
22 Based on discharge status, groups were compared using Pearson's  $\chi^2$  test for categorical variables and  
23 two-sample, unpaired t-test for continuous variables. Multivariate logistic regression was performed  
24 with death as the outcome of interest using age, gender, and chronic medical conditions and bivariate  
25 associations within the data. Interaction terms were used to evaluate interactions between  
26 independent variables. All statistical analyses were performed with Stata version 14.2 (Statacorp,  
27 College Station, TX).  
28  
29

30  
31 Patient and public involvement: Due to the urgent need to publish data on the current pandemic  
32 patients or the public were not involved in the design, conduct or reporting of this research study.  
33  
34

35  
36 Data Sharing Statement: no additional data available  
37  
38  
39  
40  
41  
42  
43  
44  
45  
46  
47  
48  
49  
50  
51  
52

**Results:**

During the study period 3,560 patients were admitted with a diagnosis of COVID-19; 3,219 patients (90.4%) were discharged or deceased and 341 patients (9.6%) were still hospitalized at the end of the study period (April 29, 2020). The demographic data for the 3,219 patients is shown in Table 1.

Overall mortality was 16.0%. Male patients had higher mortality than female patients (17.6% vs 14.5%, respectively). White patients had a mortality of 20.0% and Blacks had a mortality of 13.5%. Whites represented 37.8% of the patients who survived and 49.4% of those who died, while Blacks represented 54.8% of those patients who survived and 44.7% of those who died. For Arab or Middle Eastern patients' mortality was 9.5% and for Hispanic patients was 15.8%. The median length of hospital stay was 6.0 days, 5.6 days for the patients who were discharged alive and 8.6 days for the patients who died in the hospital.

Mortality increased with increasing age, reaching 28.1% for those patients 80 years of age and older. These results are shown in Table 2.

Comorbid medical conditions were common, with hypertension being the most common, followed by obesity, diabetes and chronic kidney disease. Each of the chronic medical conditions except asthma correlated with increased in-hospital mortality.

There were higher rates of hospital administration of hydroxychloroquine, azithromycin, therapeutic heparin, tocilizumab, and systemic corticosteroids in the group of patients who died. Use of remdesivir, prophylactic heparin, zinc and vitamin C did not differ between the two groups.

During hospitalization 571 (17.7%) received mechanical ventilation, 125 (3.9%) received BIPAP, and 848 (26.3%) received high flow oxygen. Black patients had higher rates of receiving mechanical ventilation than Whites, 19.6% vs. 15.2%, respectively. Rates of these oxygen therapies were higher in the group

1  
2  
3 that died in the hospital compared to those who were discharged alive. Specifically, 61.2% of the  
4  
5 patients who died received mechanical ventilation compared to only 9.4% of those who survived.  
6  
7

8 A logistic regression model was used to estimate the odds ratio of death when controlling for age,  
9  
10 gender, race, current smoking, and chronic medical conditions. In this model, male patients had an  
11  
12 increased odds of dying compared to female patients. The odds of dying were 1.04 for every increase in  
13  
14 year of age. There was no difference in mortality based on race. The presence of diabetes mellitus, heart  
15  
16 failure, obesity, and chronic kidney disease resulted in an increased odds of death, with chronic kidney  
17  
18 disease having the highest effect. Hypertension, coronary artery disease, asthma, chronic obstructive  
19  
20 pulmonary disease, and current smoking status were not associated with increased odds of dying. These  
21  
22 results are shown in Figure 1.  
23  
24  
25

26  
27 A second logistic regression model was used to estimate the odds ratio of death with each of the ten  
28  
29 home medications of interest when controlling for age, gender, smoking, and chronic medical  
30  
31 conditions. None of the medications were associated with an increase in odds of mortality. Specifically,  
32  
33 the odds ratio for angiotensin-converting enzymes inhibitors (ACEi) was 0.93 (CI: 0.74 to 1.18, P=0.971)  
34  
35 and angiotensin receptor blockers (ARB) 1.00 (CI:0.79 to 1.28, P=0.566).  
36  
37

38  
39 A third logistic regression model was used to estimate the odds of death when receiving the medications  
40  
41 of interest in the hospital when controlling for age, gender, smoking, and chronic medical conditions.  
42  
43 Administration of systemic corticosteroids, therapeutic heparin and vitamin C were associated with  
44  
45 increased odds of dying in the hospital. Administration of zinc and novel oral anticoagulants were  
46  
47 associated with decreased in odds of dying in the hospital. There was an increase in odds of dying with  
48  
49 the administration of tocilizumab, although, only 30 patients received this drug during the study period.  
50  
51 Similarly, only 8 patients received Remdesevir. These results are shown in Table 3.  
52  
53  
54  
55  
56  
57  
58  
59  
60

1  
2  
3 Mortality was evaluated in three time periods, pre-peak, peak, and post-peak hospital COVID-19  
4 volume. During the peak period there were over 800 COVID19 patients hospitalized each day. Overall  
5 mortality decreased significantly with each successive time period. These results are shown in Table 4.  
6  
7

8  
9  
10 A difference in the use of some treatment medications was noted in the pre-peak, peak, and post-peak  
11 periods. Specifically, hydroxychloroquine use decreased in the post-peak period but was still used in  
12 over 60% of patients. Similarly, azithromycin use decreased in the post-peak period to less than 35%  
13 compared to over 83% in the pre peak and peak periods.  
14  
15  
16  
17  
18

19  
20 Interaction terms were created in the logistic regression models to look for differing levels of effect for  
21 hospital administered medications at the three different time periods (pre-peak, peak, and post-peak).  
22 Hydroxychloroquine, azithromycin, and therapeutically dosed heparin all showed significant variation in  
23 their associated odds of death across time periods.  
24  
25  
26  
27  
28

29  
30 When controlling for other factors, use of hydroxychloroquine was associated with an increase in  
31 mortality when given in the pre-peak period (OR 2.72, CI 2.01 to 3.68,  $P<0.001$ ) and a borderline  
32 increase in the peak period (OR 1.34, CI 1.00 to 1.79,  $P=0.051$ ). When controlling for other factors, use of  
33 azithromycin was associated with a significant increase in mortality when given in the pre-peak time (OR  
34 2.15, CI 1.62 to 2.86,  $P<0.001$ ). When controlling for other factors, use of therapeutically dosed heparin  
35 was associated with an increase in mortality when given in the pre-peak (OR 5.72, CI 4.39 to 7.47,  
36  $P<0.001$ ) and peak timeframe (OR 2.76, CI 2.15 to 3.54,  $P<0.001$ ) but no significant difference in the  
37 post-peak timeframe.  
38  
39  
40  
41  
42  
43  
44  
45  
46  
47

## 48 **Discussion**

49  
50  
51 This study describes the clinical characteristics of the patients who were hospitalized with COVID-19 in  
52 the largest health system in Southeast Michigan. Similar to other studies [3-7], we showed that age and  
53  
54  
55  
56  
57  
58  
59  
60

1  
2  
3 male gender are risk factors for increasing mortality with similar odds ratios of death. Mortality reached  
4  
5 28% in patients 80 years of age and older, and the risk of death was elevated (61.2%) in patients who  
6  
7 received mechanical ventilation.  
8  
9

10 In-hospital COVID-19 mortality was 16%, which is lower than mortality rates reported in New York City  
11  
12 area [5, 7]. This difference could be explained in several ways. First, the COVID-19 peak occurred earlier  
13  
14 in New York City than Michigan which gave our hospitals and providers more lead time to prepare.  
15  
16 Second, the number of patients admitted during the peak in New York City was greater than that seen in  
17  
18 Southeast Michigan, causing comparatively less stress on hospitals in our area. Lastly, during the peak in  
19  
20 Southeast Michigan, a small number of patients were redirected to other hospital systems after  
21  
22 presentation to the emergency centers. This “load balancing” resulted in these patients not being  
23  
24 admitted and therefore analyzed, which is a limitation to our study.  
25  
26  
27  
28

29 Mortality risk was highest in the first 2 weeks of the pandemic and subsequently decreased during the  
30  
31 peak and post-peak time frames. This likely reflects improvement in the care provided to COVID-19  
32  
33 patients as hospitals and providers learned from the earlier cases. Hospital guidelines for care of COVID-  
34  
35 19 patients were updated frequently and communicated broadly as outside studies and internal findings  
36  
37 became available. Including prone positioning, delayed mechanical ventilation and broader use of  
38  
39 anticoagulation.  
40  
41  
42

43 Blacks represented over half of the admitted patients with a COVID-19 diagnosis, although, they only  
44  
45 represent 17.4% of the population served by our health system. This is consistent with the Center for  
46  
47 Disease Control and Prevention (CDC) reports showing overrepresentation of Blacks in hospitalized  
48  
49 patients with COVID-19 [8]. Blacks in our study population had a lower mortality rate than Whites,  
50  
51 13.5% vs. 20%, although this difference was not statistically significant when controlling for other  
52  
53 factors. This is not consistent with other reports showing higher COVID-19 mortality in non-hospitalized  
54  
55  
56  
57  
58  
59  
60

1  
2  
3 and hospitalized Blacks in the US. [9, 10]. In Michigan 41.3% of COVID-19 related death are Blacks  
4  
5 although they only represent 13.8% of the state population [11]. Another study of hospitalized patients  
6  
7 with COVID-19 in State of Louisiana similarly reported lower in-hospital mortality in Blacks compared to  
8  
9 Whites, 21.6% vs. 30.1% [12]. In our study hospitalized Blacks were younger on average than Whites,  
10  
11 mean age 61.8 vs. 70.5 years. This difference in age and possibly the fact that our hospital system drew  
12  
13 more suburban than urban patients could probably explain the lower rate of mortality in Blacks  
14  
15 compared to the State reported rates.  
16  
17

18  
19 Comorbid conditions were common in our patient population. Specifically, rates of hypertension,  
20  
21 diabetes, and chronic kidney disease were much higher than previously reported by the CDC and similar  
22  
23 studies in the United States [5, 7, 13]. This could be explained by many factors including the possibility  
24  
25 that our patient population has more chronic disease compared to other areas in the U.S. Comorbid  
26  
27 conditions that were associated with an increased risk of death were chronic kidney disease, heart  
28  
29 failure, diabetes, and obesity which is similar to other studies. Interestingly, hypertension was not  
30  
31 associated with worsening in-hospital survival as reported by other studies [14, 15].  
32  
33

34  
35 Concerns exist that ACEi and ARB could increase the risk of death in COVID19 patients [16]. Although our  
36  
37 study was not designed to answer this question, we found that use of these medications was not  
38  
39 associated with an increased odds ratio of death. This was consistent with other retrospective studies  
40  
41 [17].  
42  
43

44  
45 The use of specific medications during the hospital stay was associated with an increased odds of death,  
46  
47 especially systemic steroids. This may reflect provider overuse of corticosteroids in the sickest COVID-19  
48  
49 patients when other proven therapies were lacking. Hydroxychloroquine use was associated with an  
50  
51 overall higher death rate but did not reach statistical significance. When broken down by study periods,  
52  
53 however, there was an increase in odds of dying when hydroxychloroquine was administered during the  
54  
55  
56  
57  
58  
59

1  
2  
3 pre-peak period but no significant change in odds of dying in the post-peak period. This likely reflects a  
4  
5 more judicious and evidence-based approach to COVID-19 treatment later in the study period as  
6  
7 knowledge evolved. A similar pattern was seen with azithromycin.  
8  
9

10 The finding of increased mortality with therapeutically dosed heparin may be explained by several  
11  
12 factors. In the pre-peak and peak period, therapeutic heparin use was primarily limited to patients with  
13  
14 confirmed deep vein thromboses and pulmonary emboli. The odds ratio of death with the therapeutic  
15  
16 use of heparin was 5.73 and 2.76 in the pre-peak and peak period, respectively. This likely reflects that  
17  
18 these patients were sicker and would be expected to have higher mortality risk. As new data on  
19  
20 thrombotic risk in COVID-19 patients emerged over time, local guidelines shifted at the end of the peak  
21  
22 period to include the use of therapeutic heparin in patients with elevated oxygen requirements and  
23  
24 elevated D-dimer levels, even in the absence of venous thromboembolism. The use of therapeutic  
25  
26 heparin in the post peak period likely reflects use in a broader range of patients, contributing to the  
27  
28 decrease in mortality in that period.  
29  
30  
31  
32

### 33 **Limitations:**

34  
35  
36 Our study has several limitations. First, this is a retrospective study with data collected from the EHR.  
37  
38 Because of this, there is a risk of missing data points if they were not reported in a structured data  
39  
40 element that can be queried. Second, although our health system cared for the largest share of COVID-  
41  
42 19 patients in the area, the patients may not completely represent the entire population of Southeast  
43  
44 Michigan. Third, as stated above, a few patients were transferred to other health systems during the  
45  
46 peak period and their outcomes are not included in the analysis.  
47  
48  
49

### 50 **Conclusion:**



1  
2  
3 We reported the characteristics of hospitalized COVID19 patients in this case series from Southeast  
4 Michigan. Comorbid conditions were more common than the national average. Black patients were  
5 more likely to get admitted to the hospital, and to receive mechanical ventilation, but less likely to die in  
6 the hospital than Whites. The reported improvement in survival during the 3 study periods is novel and  
7 needs to be evaluated further in similar studies.  
8  
9  
10  
11  
12  
13  
14  
15  
16  
17  
18  
19  
20  
21  
22  
23  
24  
25  
26  
27  
28  
29  
30  
31  
32  
33  
34  
35  
36  
37  
38  
39  
40  
41  
42  
43  
44  
45  
46  
47  
48  
49  
50  
51  
52  
53  
54  
55  
56  
57  
58  
59  
60

**Table 1. Overall COVID-19 Patients' Characteristics and by Hospital Discharge Outcome**

|                                      | <b>Total Discharged Patients<br/>n=3,219</b> | <b>Discharged Alive<br/>n=2,703</b> | <b>Died in Hospital<br/>n=516</b> | <b>P value</b> |
|--------------------------------------|----------------------------------------------|-------------------------------------|-----------------------------------|----------------|
| <b>Demographic characteristics</b>   |                                              |                                     |                                   |                |
| Age, median (IQR), years             | 65.2 (52.6 to 77.2)                          | 63.4 (50.7 to 74.5)                 | 75.7 (65.3 to 84.2)               | <0.001         |
| Length of Stay, median (IQR), days   | 6.0 (3.2 to 10.1)                            | 5.6 (3.1 to 9.3)                    | 8.6 (4.6 to 13.4)                 | <0.001         |
| Gender                               |                                              |                                     |                                   | 0.019          |
| Male n (% of group)                  | 1,576 (49.0)                                 | 1,299 (48.1)                        | 277 (53.4)                        |                |
| Female                               | 1,643 (51.0)                                 | 1,404 (51.9)                        | 239 (46.3)                        |                |
| Race                                 |                                              |                                     |                                   | <0.001         |
| White                                | 1,277 (39.7)                                 | 1,022 (37.8)                        | 255 (49.4)                        |                |
| Blacks                               | 1,713 (53.2)                                 | 1,482 (54.8)                        | 231 (44.7)                        |                |
| Asian                                | 67 (2.1)                                     | 59 (2.1)                            | 8 (1.6)                           |                |
| American Indian                      | 5 (0.2)                                      | 5 (0.2)                             | 0 (0.0)                           |                |
| Pacific Islander                     | 2 (0.1)                                      | 2 (0.1)                             | 0 (0.0)                           |                |
| Other                                | 155 (4.8)                                    | 133 (4.9)                           | 22 (4.3)                          |                |
| Ethnicity                            |                                              |                                     |                                   | 0.253          |
| Arab or Middle Eastern               | 157 (4.9)                                    | 142 (5.3)                           | 15 (2.9)                          |                |
| Hispanic or Latino                   | 82 (2.5)                                     | 69 (2.6)                            | 13 (2.5)                          |                |
| Non-Hispanic                         | 2,776 (86.2)                                 | 2,319 (85.8)                        | 457 (88.6)                        |                |
| Other                                | 170 (5.3)                                    | 146 (5.4)                           | 24 (4.7)                          |                |
| Unavailable                          | 33 (1.0)                                     | 26 (1.0)                            | 7 (1.4)                           |                |
| <b>Medical Condition</b>             |                                              |                                     |                                   |                |
| Diabetes                             | 1,329 (41.3)                                 | 1,073 (39.7)                        | 256 (49.6)                        | <0.001         |
| Hypertension                         | 2,386 (74.1)                                 | 1,949 (72.1)                        | 437 (84.7)                        | <0.001         |
| Heart Failure                        | 609 (18.9)                                   | 440 (16.3)                          | 169 (32.8)                        | <0.001         |
| Heart Disease                        | 763 (23.7)                                   | 599 (22.2)                          | 204 (39.5)                        | <0.001         |
| Chronic Kidney Disease               | 1,299 (40.4)                                 | 929 (34.4)                          | 300 (58.1)                        | <0.001         |
| Asthma                               | 429 (13.3)                                   | 362 (13.4)                          | 67 (13.0)                         | 0.803          |
| COPD                                 | 568 (17.6)                                   | 428 (15.8)                          | 140 (27.1)                        | <0.001         |
| Obesity (BMI $\geq$ 30) <sup>a</sup> | 1,642 (51.0)                                 | 1,405 (52.0)                        | 237 (45.9)                        | 0.036          |
| Smoking <sup>b</sup>                 | 133 (4.1)                                    | 115 (4.3)                           | 18 (3.5)                          | <0.001         |
| <b>Health Insurance Payor</b>        |                                              |                                     |                                   |                |
| Medicare                             | 1,808 (56.2)                                 | 1,393 (51.5)                        | 415 (80.4)                        | <0.001         |
| Medicaid                             | 460 (14.3)                                   | 429 (15.9)                          | 31 (6.0)                          |                |

|                              |              |              |            |        |
|------------------------------|--------------|--------------|------------|--------|
| Commercial                   | 897 (27.9)   | 836 (30.9)   | 61 (11.8)  |        |
| Military                     | 7 (0.2)      | 5 (0.2)      | 2 (0.4)    |        |
| Exchange                     | 41 (1.3)     | 37 (1.4)     | 4 (0.8)    |        |
| Unknown                      | 6 (0.2)      | 3 (0.1)      | 3 (0.6)    |        |
|                              |              |              |            |        |
|                              |              |              |            |        |
| <b>Home Medication</b>       |              |              |            |        |
| Aspirin                      | 1,354 (42.1) | 1,054 (39.0) | 300 (58.1) | <0.001 |
| ACE Inhibitor                | 940 (29.2)   | 757 (28.0)   | 183 (35.5) | 0.001  |
| Angiotensin Receptor Blocker | 676 (21.0)   | 533 (19.7)   | 143 (27.7) | <0.001 |
| Metformin                    | 688 (21.4)   | 565 (20.9)   | 123 (23.8) | 0.136  |
| Insulin                      | 490 (15.2)   | 377 (14.0)   | 113 (21.9) | <0.001 |
| Warfarin                     | 230 (7.1)    | 173 (6.4)    | 57 (11.1)  | <0.001 |
| NOAC                         | 347 (10.8)   | 271 (10.0)   | 76 (14.7)  | 0.002  |
| Inhaled Corticosteroid       | 472 (14.7)   | 367 (13.6)   | 105 (20.4) | <0.001 |
| LABA                         | 318 (9.9)    | 240 (8.9)    | 78 (15.1)  | <0.001 |
| LAMA                         | 197 (6.1)    | 150 (5.6)    | 47 (9.1)   | 0.002  |
|                              |              |              |            |        |
| <b>Hospital Medication</b>   |              |              |            |        |
| Hydroxychloroquine           | 2,496 (77.5) | 2,061 (76.3) | 435 (84.3) | <0.001 |
| Azithromycin                 | 2,463 (76.5) | 2,046 (75.7) | 417 (80.8) | 0.012  |
| Prophylactic Heparin         | 2,547 (79.1) | 2,136 (79.0) | 411 (79.7) | 0.748  |
| Therapeutic Heparin          | 1,257 (39.0) | 916 (33.9)   | 341 (67.0) | <0.001 |
| Tocilizumab                  | 30 (0.9)     | 18 (0.7)     | 12 (2.3)   | <0.001 |
| Remdesivir                   | 8 (0.2)      | 7 (0.3)      | 1 (0.2)    | 0.785  |
| Systemic corticosteroids     | 1,631 (50.7) | 1,265 (46.8) | 366 (70.9) | <0.001 |
| NOAC                         | 340 (10.6)   | 291 (10.8)   | 49 (9.5)   | 0.390  |
| Zinc                         | 1,596 (49.6) | 1,340 (49.6) | 256 (49.6) | 0.987  |
| Vitamin C                    | 794 (24.7)   | 637 (23.6)   | 157 (30.4) | 0.001  |
|                              |              |              |            |        |
| <b>Oxygen Therapy</b>        |              |              |            |        |
| High Flow O2                 | 848 (26.3)   | 534 (19.8)   | 314 (60.9) | <0.001 |
| BiPAP                        | 125 (3.9)    | 73 (2.7)     | 52 (10.1)  | <0.001 |
| CPAP                         | 93 (2.9)     | 59 (2.2)     | 34 (6.6)   | <0.001 |
| Nonrebreather Mask           | 867 (26.9)   | 537 (19.9)   | 330 (64.0) | <0.001 |
| Mechanical Ventilation       | 571 (17.7)   | 255 (9.4)    | 316 (61.2) | <0.001 |

Abbreviations: COVID-19, Coronavirus disease 2019; BMI, body mass index (calculated as weight in kilograms divided by height in meters squared); NOAC, Non-vitamin K oral anticoagulation; LABA, Long-acting beta-agonist; LAMA, Long acting muscarinic antagonist; BiPAP, Bilevel positive airway pressure; CPAP, Continuous positive airway pressure. <sup>a</sup> BMI data available for 3135 patients. <sup>b</sup> smoking data available for 2517 patients.

**Table 2. Overall Mortality by Age Category of Discharged Patients who were Admitted with a COVID-19 Diagnosis**

| Age Category, years | Total Patients | Alive at Discharge, n (%) | Deceased, n (%) |
|---------------------|----------------|---------------------------|-----------------|
| <18                 | 8              | 7 (87.5)                  | 1 (12.5)        |
| 19-40               | 295            | 285 (96.6)                | 10 (3.4)        |
| 41-50               | 370            | 350 (94.6)                | 20 (5.4)        |
| 51-60               | 554            | 510 (92.1)                | 44 (7.9)        |
| 61-70               | 737            | 631 (85.6)                | 106 (14.4)      |
| 71-80               | 621            | 464 (74.7)                | 157 (25.3)      |
| >80                 | 634            | 456 (71.9)                | 178 (28.1)      |

**Table 3. Odds Ratio of Death from Logistic Regression Model for In-hospital Treatment Medications when Controlling for Age, Gender, and Chronic Medical Conditions**

| Medication                | Odds Ratio of Death | Confidence Interval | P-Value |
|---------------------------|---------------------|---------------------|---------|
| Hydroxychloroquine        | 1.33                | 0.95 to 1.88        | 0.102   |
| Azithromycin              | 1.11                | 0.82 to 1.49        | 0.489   |
| Vitamin C                 | 1.40                | 1.08 to 1.81        | 0.011   |
| Zinc                      | 0.50                | 0.39 to 0.64        | <0.001  |
| Novel oral anticoagulants | 0.42                | 0.29 to 0.60        | <0.001  |
| Systemic corticosteroids  | 2.45                | 1.91 to 3.12        | <0.001  |
| Remdesivir <sup>a</sup>   | 2.22                | 0.18 to 27.5        | 0.535   |
| Tocilizumab <sup>b</sup>  | 2.23                | 0.99 to 5.02        | 0.052   |
| Prophylactic heparin      | 0.76                | 0.57 to 1.02        | 0.071   |
| Therapeutic heparin       | 3.06                | 2.44 to 3.83        | <0.001  |

<sup>a</sup> only 8 patients received Remdesivir. <sup>b</sup> only 30 patients received Tocilizumab

**Table 4. Overall Mortality by Time of Admission for Patients who were Discharged During Study Period. N=3,219**

| Time Frame                 | Total Hospital Admissions | Discharged Alive (%) | Died in the Hospital (%) |
|----------------------------|---------------------------|----------------------|--------------------------|
| Pre-peak (3/13- 3/30/2020) | 1,447                     | 1,180 (81.5)         | 267 (18.5)               |
| Peak (3/31- 4/13/2020)     | 1,279                     | 1,083 (84.7)         | 196 (15.3)               |
| Post-peak (4/14-4/29/2020) | 493                       | 440 (89.2)           | 53 (10.8)                |

**Figure 1. Odds Ratio of Death from Logistic Regression Model when Controlling for Gender, Age, Race, Current Smoking, and Comorbidities.**

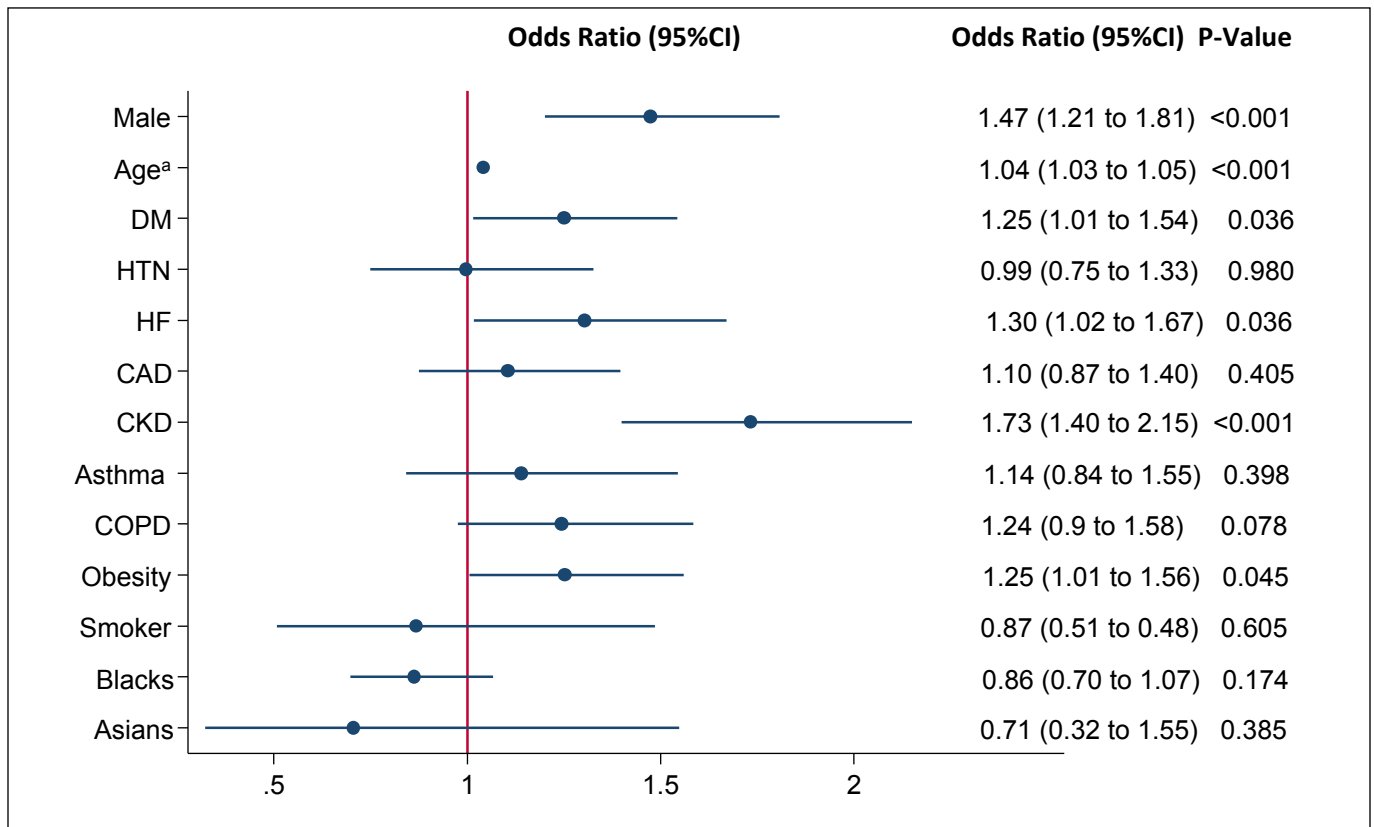

Abbreviations: DM, Diabetes Mellitus; HTN, hypertension; HF, heart failure; CAD, coronary artery disease; CKD, chronic kidney disease; COPD, chronic obstructive pulmonary disease. <sup>a</sup> Age: for every increase of one year in age

## References:

1. Phelan, A.L., R. Katz, and L.O. Gostin, *The Novel Coronavirus Originating in Wuhan, China: Challenges for Global Health Governance*. JAMA, 2020.
2. Michigan.gov, C.M.D. accessed 6/1/2020]; Available from: [https://www.michigan.gov/coronavirus/0,9753,7-406-98163\\_98173---,00.html](https://www.michigan.gov/coronavirus/0,9753,7-406-98163_98173---,00.html)
3. Xie, J., et al., *Clinical Characteristics of Patients Who Died of Coronavirus Disease 2019 in China*. JAMA Netw Open, 2020. **3**(4): p. e205619.
4. Grasselli, G., et al., *Baseline Characteristics and Outcomes of 1591 Patients Infected With SARS-CoV-2 Admitted to ICUs of the Lombardy Region, Italy*. JAMA, 2020.
5. Richardson, S., et al., *Presenting Characteristics, Comorbidities, and Outcomes Among 5700 Patients Hospitalized With COVID-19 in the New York City Area*. JAMA, 2020.
6. Zhou, F., et al., *Clinical course and risk factors for mortality of adult inpatients with COVID-19 in Wuhan, China: a retrospective cohort study*. Lancet, 2020. **395**(10229): p. 1054-1062.
7. Petrilli, C.M., et al., *Factors associated with hospital admission and critical illness among 5279 people with coronavirus disease 2019 in New York City: prospective cohort study*. BMJ, 2020. **369**: p. m1966.
8. Garg S, K.L., Whitaker M, et al. , *Hospitalization Rates and Characteristics of Patients Hospitalized with Laboratory-Confirmed Coronavirus Disease 2019 — COVID-NET, 14 States, March 1–30, 2020*. MMWR Morb Mortal Wkly Rep, 2020. **2020;69:458–464**.
9. Yancy, C.W., *COVID-19 and African Americans*. JAMA, 2020.
10. New York State Department of Health. COVID-19 fatalities. Updated May 31. Accessed June 1, 2020.]; Available from: <https://covid19tracker.health.ny.gov/views/NYS-COVID19-Tracker/NYSDOHCOVID-19Tracker-Fatalities?%3Aembed=yes&%3Atoolbar=no&%3Atabs=n>.

- 1  
2  
3 11. APM Research lab, A.R. *The Color of Coronavirus*. Last accessed 6/16/2020]; Available from:  
4  
5 <https://www.apmresearchlab.org/covid/deaths-by-race#reporting>.  
6
- 7  
8 12. Price-Haywood, E.G., et al., *Hospitalization and Mortality among Black Patients and White*  
9  
10 *Patients with Covid-19*. N Engl J Med, 2020.
- 11  
12 13. *Preliminary Estimates of the Prevalence of Selected Underlying Health Conditions Among*  
13  
14 *Patients with Coronavirus Disease 2019 — United States, February 12–March 28, 2020*. . MMWR  
15  
16 Morb Mortal Wkly Rep 2020;69:382–386.
- 17  
18 14. Cummings, M.J., et al., *Epidemiology, clinical course, and outcomes of critically ill adults with*  
19  
20 *COVID-19 in New York City: a prospective cohort study*. Lancet, 2020.
- 21  
22 15. Wu, Z. and J.M. McGoogan, *Characteristics of and Important Lessons From the Coronavirus*  
23  
24 *Disease 2019 (COVID-19) Outbreak in China: Summary of a Report of 72314 Cases From the*  
25  
26 *Chinese Center for Disease Control and Prevention*. JAMA, 2020.
- 27  
28 16. Sommerstein, R., et al., *Coronavirus Disease 2019 (COVID-19): Do Angiotensin-Converting*  
29  
30 *Enzyme Inhibitors/Angiotensin Receptor Blockers Have a Biphasic Effect?* J Am Heart Assoc,  
31  
32 2020. **9**(7): p. e016509.
- 33  
34 17. Mackey, K., et al., *Risks and Impact of Angiotensin-Converting Enzyme Inhibitors or Angiotensin-*  
35  
36 *Receptor Blockers on SARS-CoV-2 Infection in Adults*. Ann Intern Med, 2020.
- 37  
38  
39  
40  
41  
42  
43  
44  
45  
46  
47  
48  
49  
50  
51  
52  
53  
54  
55  
56  
57  
58  
59  
60

# BMJ Open

## Retrospective Case Cohort Study of 3,219 Hospitalized Patients with COVID-19 in Southeast Michigan

|                                 |                                                                                                                                                                                                                                                                               |
|---------------------------------|-------------------------------------------------------------------------------------------------------------------------------------------------------------------------------------------------------------------------------------------------------------------------------|
| Journal:                        | <i>BMJ Open</i>                                                                                                                                                                                                                                                               |
| Manuscript ID                   | bmjopen-2020-042042.R1                                                                                                                                                                                                                                                        |
| Article Type:                   | Original research                                                                                                                                                                                                                                                             |
| Date Submitted by the Author:   | 10-Nov-2020                                                                                                                                                                                                                                                                   |
| Complete List of Authors:       | Mulhem, Elie; Oakland University William Beaumont School of Medicine, Family Medicine<br>Oleszkowicz, Andrew; Oakland University William Beaumont School of Medicine, Family Medicine<br>Lick, David; Oakland University William Beaumont School of Medicine, Family Medicine |
| <b>Primary Subject Heading</b>: | Infectious diseases                                                                                                                                                                                                                                                           |
| Secondary Subject Heading:      | Public health, Respiratory medicine                                                                                                                                                                                                                                           |
| Keywords:                       | INFECTIOUS DISEASES, Respiratory infections < THORACIC MEDICINE, Epidemiology < INFECTIOUS DISEASES                                                                                                                                                                           |
|                                 |                                                                                                                                                                                                                                                                               |

SCHOLARONE™  
Manuscripts





I, the Submitting Author has the right to grant and does grant on behalf of all authors of the Work (as defined in the below author licence), an exclusive licence and/or a non-exclusive licence for contributions from authors who are: i) UK Crown employees; ii) where BMJ has agreed a CC-BY licence shall apply, and/or iii) in accordance with the terms applicable for US Federal Government officers or employees acting as part of their official duties; on a worldwide, perpetual, irrevocable, royalty-free basis to BMJ Publishing Group Ltd ("BMJ") its licensees and where the relevant Journal is co-owned by BMJ to the co-owners of the Journal, to publish the Work in this journal and any other BMJ products and to exploit all rights, as set out in our [licence](#).

The Submitting Author accepts and understands that any supply made under these terms is made by BMJ to the Submitting Author unless you are acting as an employee on behalf of your employer or a postgraduate student of an affiliated institution which is paying any applicable article publishing charge ("APC") for Open Access articles. Where the Submitting Author wishes to make the Work available on an Open Access basis (and intends to pay the relevant APC), the terms of reuse of such Open Access shall be governed by a Creative Commons licence – details of these licences and which [Creative Commons](#) licence will apply to this Work are set out in our licence referred to above.

Other than as permitted in any relevant BMJ Author's Self Archiving Policies, I confirm this Work has not been accepted for publication elsewhere, is not being considered for publication elsewhere and does not duplicate material already published. I confirm all authors consent to publication of this Work and authorise the granting of this licence.

1  
2  
3 **Retrospective Case Cohort Study of 3,219 Hospitalized Patients with COVID-19 in Southeast Michigan**  
4

5 Elie Mulhem (0000-0003-0194-2203), Andrew Oleszkowicz (0000-0001-9137-7337), David Lick (0000-  
6  
7 0002-3164-6889)

8  
9  
10 Oakland University William Beaumont School of Medicine. Rochester, MI, USA Elie Mulhem, M.D.

11 Professor, Department of Family Medicine and Community Health, David Lick, M.D. Professor,

12 Department of Family Medicine and Community Health, Andrew Oleszkowicz, M.D. Assistant Professor,

13  
14 Department of Family Medicine and Community Health.  
15  
16  
17

18  
19  
20  
21 Corresponding Author: Elie Mulhem, M.D.

22  
23 44250 Dequindre Road

24  
25 Sterling Heights, MI 48314

26  
27 [Elie.mulhem@beaumont.edu](mailto:Elie.mulhem@beaumont.edu)  
28  
29  
30  
31  
32  
33

34 Word count: 2784  
35  
36  
37  
38  
39  
40  
41  
42  
43  
44  
45  
46  
47  
48  
49  
50  
51  
52  
53  
54  
55  
56  
57  
58  
59  
60

### Retrospective Case Cohort Study of 3,219 Hospitalized Patients with COVID-19 in Southeast Michigan

#### Abstract:

**Objectives:** To report the clinical characteristic of patients hospitalized with COVID-19 in Southeast Michigan.

**Design:** Retrospective cohort study

**Setting:** Eight hospitals in Southeast Michigan.

**Participants:** 3219 hospitalized patients with a positive SARS-CoV-2 infection by nasopharyngeal polymerase chain reaction (PCR) test from March 13,2020 until April 29, 2020.

**Main outcomes measures:** Outcomes were discharge from the hospital or in-hospital death. Examined predictors included patient demographics, chronic diseases, home medications, mechanical ventilation, in-hospital medications, and timeframe of hospital admission. Multivariable logistic regression was conducted to identify risk factors for in-hospital mortality.

**Results:** During the study period, 3,219 (90.4%) patients were discharged or died in the hospital. Median age was 65.2 (IQR 52.6 to 77.2) years, median length of stay in the hospital was 6.0 (IQR 3.2 to 10.1) days, and 51% were females. Hypertension was the most common chronic diseases occurring in 2,386 (74.1%) patients. Overall mortality rate was 16.0%. Blacks represented 52.3% of the patients and had a mortality rate of 13.5%. Mortality was highest at 18.5% in the pre-peak hospital COVID-19 volume, decreasing to 15.3% during the peak period and to 10.8% in the post-peak period. Multivariable regression showed increasing odds of in-hospital death associated with older age (odds ratio 1.04, 95% CI 1.03 to 1.05;  $p<0.001$ ) for every increase in one year of age and being male (1.47 (95% CI 1.21 to 1.81;  $p<0.001$ ). Certain chronic diseases increased the odds of in-hospital mortality especially chronic kidney

1  
2  
3 disease. Administration of vitamin C, corticosteroids, and therapeutic heparin in the hospital were  
4  
5 associated with higher odds of death.  
6  
7

8 **Conclusion:** In-hospital mortality was highest in early admissions and improved as our experience in  
9  
10 treating COVID-19 patients increased. Black were more likely to get admitted to the hospital, and to  
11  
12 receive mechanical ventilation, but less likely to die in the hospital than Whites.  
13  
14  
15  
16  
17  
18  
19  
20  
21  
22  
23  
24  
25  
26  
27  
28  
29  
30  
31  
32  
33  
34  
35  
36  
37  
38  
39  
40  
41  
42  
43  
44  
45  
46  
47  
48  
49  
50  
51  
52  
53  
54  
55  
56  
57  
58  
59  
60

**Strength and limitations:**

- This is the largest study to date to describe the hospitalized patient population with SARS-CoV-2 in Southeast Michigan.
- The study population represents a large and diverse metropolitan area using data from the largest healthcare system in the region.
- This study relied on data collected from the EHR and thus there is risk of missing data points if they were not reported in a structured data element that could be queried.
- Although our health system cared for the largest share of patients with SARS-CoV-2 in the region, the patients may not completely represent the entire population of Southeast Michigan.
- Due to its retrospective design, results are subject to confounding factors.

1  
2  
3 Coronavirus disease 2019 (COVID-19) was first reported as an outbreak of pneumonia of unknown cause  
4  
5 in Wuhan, China in December 2019.[1] The virus responsible was subsequently named severe acute  
6  
7 respiratory syndrome coronavirus 2 (SARS-CoV-2). The first confirmed case in the United States was  
8  
9 reported January 31, 2020, and the first case in Michigan was reported March 10, 2020 [2]. As of June 1,  
10  
11 2020, 57,532 cases were confirmed in Michigan with 5,516 attributed deaths [2]. Southeast Michigan  
12  
13 has been the epicenter of COVID-19 in the state [2].  
14  
15

16  
17 As the pandemic spread, clinical characteristics of hospitalized COVID-19 patients were described in the  
18  
19 medical literature from around the world, including China[3], Italy[4] New York City[5], Louisiana[6], and  
20  
21 Michigan[7]. These studies indicated that increase age, male sex, and presence of chronic medical  
22  
23 conditions increase risk of death during hospitalization. In this report we aim to describe the clinical  
24  
25 characteristics of a large cohort of patients hospitalized with COVID-19 in Southeast Michigan.  
26  
27

28 Understanding the clinical characteristics of hospitalized COVID-19 patients in the Midwest region of the  
29  
30 United States will help to provide a more complete description of this population on a national level.  
31

32 We compared those who did not survive hospitalization with those who were discharged alive between  
33  
34 March 13, 2020 and April 29, 2020. We also report overall mortality rates during three periods of the  
35  
36 COVID-19 surge, before, during and after the peak of COVID-19 hospital volumes.  
37  
38

#### 39 40 **Methods:**

41  
42 This study was conducted at an eight-hospital health system in Southeast Michigan. Southeast Michigan  
43  
44 is the Metro area of Detroit and is home to 4.5 Million people, almost half of the population of the State  
45  
46 of Michigan. The study was approved by the Institutional Review Board. Patients were included in the  
47  
48 study if they tested positive for SARS-CoV-2 infection by nasopharyngeal polymerase chain reaction  
49  
50 (PCR) test and were admitted to one of the eight hospitals between March 13, 2020 and April 29, 2020.  
51  
52 Data were collected retrospectively from the electronic health record (Epic). Data collected included  
53  
54  
55  
56  
57  
58  
59  
60

1  
2  
3 date of admission and discharge, patient demographics, home medications, common chronic medical  
4 conditions, inpatient medications received for treatment of COVID19, oxygen therapy, and status at  
5 time of discharge from the hospital. Data were available for all patients during the study period. Patients  
6 who were still admitted at the end of the study period were not included in data analysis.  
7  
8  
9

10  
11  
12 Race and ethnicity were available by self-reported status in the electronic health record (EHR). White  
13 patients tend to live in suburban communities while Black patients tend to live in urban and poorer  
14 communities. Home medications of interest were assessed based on medication reconciliation by the  
15 attending physician at the time of admission. Inpatient medications of interest were obtained from the  
16 medication administration record. Chronic medical conditions assessed include diabetes mellitus (DM),  
17 hypertension (HTN), heart failure (HF), coronary artery disease (CAD), chronic kidney disease (CKD),  
18 obesity (BMI  $\geq 30$ ), asthma, and chronic obstructive pulmonary disease (COPD). Documentation of these  
19 conditions in the medical history, problem list before admission, problem list during the admission, or  
20 discharge diagnoses in the EHR was used to evaluate the presence of these conditions. Patients were  
21 grouped as living or deceased based on status at the time of discharge from the hospital.  
22  
23  
24  
25  
26  
27  
28  
29  
30  
31  
32  
33  
34  
35

36 To evaluate the change in risk of mortality during the study, three periods were created: pre-peak, peak,  
37 and post-peak hospital COVID-19 volume. These periods were March 13,2020 to March 30, 2020, March  
38 31,2020 to April 13, 2020, and April 14,2020 to April 29, 2020. Peak was defined as the two-week period  
39 when the maximum number patients were admitted to the hospital system with a diagnosis of COVID-  
40 19.  
41  
42  
43  
44  
45  
46  
47

48 Based on discharge status, groups were compared using Pearson's  $\chi^2$  test for categorical variables and  
49 two-sample, unpaired t-test for continuous variables. Multivariate logistic regression was performed  
50 with death as the outcome of interest using age, gender, and chronic medical conditions and bivariate  
51 associations within the data. Four separate models were created and are described in further detail in  
52  
53  
54  
55  
56  
57  
58  
59  
60

1  
2  
3 the Supplement. All variables were added to the models a priori.. All statistical analyses were  
4 performed with Stata version 14.2 (Statacorp, College Station, TX).  
5  
6  
7

8 Patient and public involvement: Due to the urgent need to publish data on the current pandemic  
9 patients or the public were not involved in the design, conduct or reporting of this research study.  
10  
11  
12

13 Data Sharing Statement: no additional data available  
14  
15

### 16 **Results:**

17  
18  
19 During the study period 3,560 patients were admitted with a diagnosis of COVID-19; 3,219 patients  
20 (90.4%) were discharged or deceased and 341 patients (9.6%) were still hospitalized at the end of the  
21 study period (April 29, 2020). The demographic data for the 3,219 patients is shown in Table 1.  
22  
23  
24

25  
26 Overall mortality was 16.0%. Male patients had higher mortality than female patients (17.6% vs 14.5%,  
27 respectively). White patients had a mortality of 20.0% and Blacks had a mortality of 13.5%. Whites  
28 represented 37.8% of the patients who survived and 49.4% of those who died, while Blacks represented  
29 54.8% of those patients who survived and 44.7% of those who died. For Arab or Middle Eastern patients'  
30 mortality was 9.5% and for Hispanic patients was 15.8%. The median length of hospital stay was 6.0  
31 days, 5.6 days for patients who were discharged alive and 8.6 days for the patients who died in the  
32 hospital.  
33  
34  
35  
36  
37  
38  
39  
40  
41  
42

43 Mortality increased with increasing age, reaching 28.1% for those patients 80 years of age and older.  
44 These results are shown in Table 2.  
45  
46

47  
48 Comorbid medical conditions were common, with hypertension being the most common, followed by  
49 obesity, diabetes and chronic kidney disease. Each of the chronic medical conditions except asthma  
50 correlated with increased in-hospital mortality.  
51  
52  
53  
54  
55  
56  
57  
58  
59  
60



1  
2  
3 There were higher rates of hospital administration of hydroxychloroquine, azithromycin, therapeutic  
4 heparin, tocilizumab, and systemic corticosteroids in the group of patients who died. Use of remdesivir,  
5 prophylactic heparin, zinc and vitamin C did not differ between the two groups.  
6  
7

8  
9  
10 During hospitalization 571 (17.7%) received mechanical ventilation, 125 (3.9%) received BIPAP, and 848  
11 (26.3%) received high flow oxygen. Black patients had higher rates of receiving mechanical ventilation  
12 than Whites, 19.6% vs. 15.2%, respectively. Rates of these oxygen therapies were higher in the group  
13 that died in the hospital compared to those who were discharged alive. Specifically, 61.2% of the  
14 patients who died received mechanical ventilation compared to only 9.4% of those who survived.  
15  
16

17  
18 Mortality was evaluated in three time periods, pre-peak, peak, and post-peak hospital COVID-19  
19 volume. During the peak period there were over 800 COVID-19 patients hospitalized each day. Overall  
20 mortality decreased significantly with each successive time period. These results are shown in Table 3.  
21  
22

23  
24 A difference in the use of some treatment medications was noted in the pre-peak, peak, and post-peak  
25 periods. Specifically, hydroxychloroquine use decreased in the post-peak period but was still used in  
26 over 60% of patients. Similarly, azithromycin use decreased in the post-peak period to less than 35%  
27 compared to over 83% in the pre peak and peak periods. A logistic regression model was used to  
28 estimate the odds ratio of death when controlling for age, gender, race, current smoking, and chronic  
29 medical conditions. In this model, male patients had an increased odds of dying compared to female  
30 patients. The odds of dying were 1.04 for every increase in year of age. There was no difference in  
31 mortality based on race. The presence of diabetes mellitus, heart failure, obesity, and chronic kidney  
32 disease resulted in increased odds of death, with chronic kidney disease having the highest effect.  
33  
34 Hypertension, coronary artery disease, asthma, chronic obstructive pulmonary disease, and current  
35 smoking status were not associated with increased odds of dying. These results are shown in Figure 1.  
36  
37  
38  
39  
40  
41  
42  
43  
44  
45  
46  
47  
48  
49  
50  
51  
52  
53  
54  
55  
56  
57  
58  
59  
60

1  
2  
3 A second logistic regression model was used to estimate the odds ratio of death with each of the ten  
4 home medications of interest when controlling for age, gender, smoking, and chronic medical  
5 conditions. None of the medications were associated with an increase in odds of mortality. Specifically,  
6 the odds ratio for angiotensin-converting enzymes inhibitors (ACEi) was 0.93 (CI: 0.74 to 1.18, P=0.971)  
7 and angiotensin receptor blockers (ARBs) was 1.00 (CI:0.79 to 1.28, P=0.566). The full results of this  
8 model are found in Table S1 in the Supplement.  
9

10  
11  
12 A third logistic regression model was used to estimate the odds of death when receiving the medications  
13 of interest in the hospital when controlling for age, gender, smoking, and chronic medical conditions.  
14 Administration of systemic corticosteroids, therapeutic heparin and vitamin C were associated with  
15 increased odds of dying in the hospital. Administration of zinc and novel oral anticoagulants were  
16 associated with decreased in odds of dying in the hospital. There was an increase in odds of dying with  
17 the administration of tocilizumab, although, only 30 patients received this drug during the study period.  
18 Similarly, only 8 patients received Remdesevir. These results are shown in Table 4.  
19

20  
21  
22 Categorical variables were created in the fourth logistic regression models to look for differing levels of  
23 effect for hospital administered hydroxychloroquine, azithromycin, and therapeutically dosed heparin at  
24 the three different time periods (pre-peak, peak, and post-peak). All three medications showed  
25 significant variation in their associated odds of death across time periods.  
26

27  
28  
29 When controlling for other factors, use of hydroxychloroquine was associated with an increase in  
30 mortality when given in the pre-peak period (OR 2.36, CI 1.39 to 4.00, P=0.018), but nonsignificant  
31 changes in mortality in the other two time periods. When controlling for other factors, use of  
32 azithromycin was not associated with significant differences in mortality over the three time periods.  
33

34  
35  
36 When controlling for other factors, use of therapeutically dosed heparin was associated with an increase  
37 in mortality when given in the pre-peak (OR 3.97, CI 2.90 to 5.44, P<0.001) and peak timeframe (OR  
38

1  
2  
3 3.38, CI 2.47 to 4.61,  $P < 0.001$ ) but no significant difference in the post-peak timeframe. The full results  
4  
5 of this model are found in Table S2 in the Supplement.  
6  
7

## 8 **Discussion**

9

10  
11 This study describes the clinical characteristics of the patients who were hospitalized with COVID-19 in  
12  
13 the largest health system in Southeast Michigan. Similar to other studies [3-5, 8, 9], we showed that age  
14  
15 and male gender are risk factors for increasing mortality with similar odds ratios of death. Mortality  
16  
17 reached 28% in patients 80 years of age and older, and the risk of death was elevated (61.2%) in patients  
18  
19 who received mechanical ventilation.  
20  
21

22  
23 In-hospital COVID-19 mortality was 16%, which is lower than mortality rates reported in the New York  
24  
25 City area [5, 9]. This difference could be explained in several ways. First, the COVID-19 peak occurred  
26  
27 earlier in New York City than Michigan which gave our hospitals and providers more lead time to  
28  
29 prepare. Second, the number of patients admitted during the peak in New York City was greater than  
30  
31 that seen in Southeast Michigan, causing comparatively less stress on hospitals in our area. Lastly,  
32  
33 during the peak in Southeast Michigan, a small number of patients were redirected to other hospital  
34  
35 systems after presentation to the emergency centers. This “load balancing” resulted in these patients  
36  
37 not being admitted and therefore analyzed, which is a limitation to our study.  
38  
39

40  
41 Mortality risk was highest in the first 2 weeks of the pandemic and subsequently decreased during the  
42  
43 peak and post-peak time frames. This likely reflects improvement in the care provided to COVID-19  
44  
45 patients as hospitals and providers learned from the earlier cases. Hospital guidelines for care of COVID-  
46  
47 19 patients were updated frequently and communicated broadly as outside studies and internal findings  
48  
49 became available. Changes instituted including prone positioning, delayed mechanical ventilation and  
50  
51 broader use of anticoagulation.  
52  
53  
54  
55  
56  
57  
58  
59  
60

1  
2  
3 Blacks represented over half of the admitted patients with a COVID-19 diagnosis, although, they only  
4 represent 17.4% of the population served by our health system. This is consistent with the Center for  
5  
6 Disease Control and Prevention (CDC) reports showing overrepresentation of Blacks in hospitalized  
7  
8 patients with COVID-19 [10]. Blacks in our study population had a lower mortality rate than Whites,  
9  
10 13.5% vs. 20%, although this difference was not statistically significant when controlling for other  
11  
12 factors. This is not consistent with other reports showing higher COVID-19 mortality in non-hospitalized  
13  
14 and hospitalized Blacks in the US. [11, 12]. In Michigan, 41.3% of COVID-19 related death are Blacks  
15  
16 although they only represent 13.8% of the state population [13]. Another study of hospitalized patients  
17  
18 with COVID-19 in the State of Louisiana similarly reported lower in-hospital mortality in Blacks compared  
19  
20 to Whites, 21.6% vs. 30.1% [6]. In our study hospitalized Blacks were younger on average than Whites,  
21  
22 mean age 61.8 vs. 70.5 years. Further evaluation of the data showed 26.7% of Blacks in the study were  
23  
24 50 years of age or younger compared to 12.5% of Whites while only 11.6% of Blacks were over the age  
25  
26 of 80 years compared to 30.4% of Whites. This difference in age distribution is significant, the model did  
27  
28 control for age, so this difference in age cannot entirely explain the lower rate of mortality in Blacks.  
29  
30  
31  
32  
33

34  
35 Comorbid conditions were common in our patient population. Specifically, rates of hypertension,  
36  
37 diabetes, and chronic kidney disease were much higher than previously reported by the CDC and similar  
38  
39 studies in the United States [5, 6, 9, 10]. This could be explained by many factors including the possibility  
40  
41 that our patient population has more chronic disease compared to other areas in the U.S. Comorbid  
42  
43 conditions that were associated with an increased risk of death were chronic kidney disease, heart  
44  
45 failure, diabetes, and obesity which is similar to other studies. Interestingly, hypertension was not  
46  
47 associated with worsening in-hospital survival as reported by other studies [14, 15].  
48  
49

50  
51 Concerns exist that ACEi and ARBs could increase the risk of death in COVID19 patients [16]. Although  
52  
53 our study was not designed to answer this question, we found that use of these medications was not  
54  
55  
56  
57  
58  
59

1  
2  
3 associated with an increased odds ratio of death. This was consistent with other retrospective studies  
4  
5 [17].  
6  
7

8 The use of specific medications during the hospital stay was associated with increased odds of death,  
9  
10 especially systemic steroids. This may reflect provider overuse of corticosteroids in the sickest COVID-19  
11  
12 patients when other proven therapies were lacking. Hydroxychloroquine use was associated with an  
13  
14 overall higher death rate but did not reach statistical significance. When broken down by study periods,  
15  
16 however, there was an increase in odds of dying when hydroxychloroquine was administered during the  
17  
18 pre-peak period but no significant change in odds of dying in the post-peak period. This likely reflects a  
19  
20 more judicious and evidence-based approach to COVID-19 treatment later in the study period as  
21  
22 knowledge evolved. A similar pattern was seen with azithromycin.  
23  
24  
25  
26

27 The finding of increased mortality with therapeutically dosed heparin may be explained by several  
28  
29 factors. In the pre-peak and peak period, therapeutic heparin use was primarily limited to patients with  
30  
31 confirmed deep vein thromboses and pulmonary emboli. The odds ratio of death with the therapeutic  
32  
33 use of heparin was 5.73 and 2.76 in the pre-peak and peak period, respectively. This likely reflects that  
34  
35 these patients were sicker and would be expected to have higher mortality risk. As new data on  
36  
37 thrombotic risk in COVID-19 patients emerged over time, local guidelines shifted at the end of the peak  
38  
39 period to include the use of therapeutic heparin in patients with elevated oxygen requirements and  
40  
41 elevated D-dimer levels, even in the absence of venous thromboembolism. The use of therapeutic  
42  
43 heparin in the post peak period likely reflects use in a broader range of patients, contributing to the  
44  
45 decrease in mortality in that period.  
46  
47  
48  
49

50 Strength of the study includes that it is the largest report of hospitalized COVID-19 patients in Southeast  
51  
52 Michigan; and we included diverse population from the largest health system in the Detroit  
53  
54 metropolitan area.  
55  
56  
57  
58  
59  
60

**Limitations:**

Our study has several limitations. First, this is a retrospective study with data collected from the EHR. Because of this, there is a risk of missing data points if they were not reported in a structured data element that can be queried. Second, although our health system cared for the largest share of COVID-19 patients in the area, the patients may not completely represent the entire population of Southeast Michigan. Third, as stated above, a few patients were transferred to other health systems during the peak period and their outcomes are not included in this analysis.

**Conclusion:**

We reported the characteristics of the largest cohort of hospitalized COVID19 patients in Southeast Michigan. As the coronavirus pandemic continues to progress across the United States, understanding of the medical comorbidities and sociodemographic factors associated with hospitalization and mortality will aid in identifying populations at elevated risk. In this cohort, comorbid conditions were more common than the national average. Black patients were more likely to get admitted to the hospital, and to receive mechanical ventilation, but less likely to die in the hospital than Whites. The reported significant improvement in survival during the 3 study periods is novel and needs to be evaluated further in similar studies.

**Table 1. Overall COVID-19 Patients' Characteristics and by Hospital Discharge Outcome**

|                                      | <b>Total Discharged Patients<br/>n=3,219</b> | <b>Discharged Alive<br/>n=2,703</b> | <b>Died in Hospital<br/>n=516</b> | <b>P value*</b> |
|--------------------------------------|----------------------------------------------|-------------------------------------|-----------------------------------|-----------------|
| <b>Demographic characteristics</b>   |                                              |                                     |                                   |                 |
| Age, median (IQR), years             | 65.2 (52.6 to 77.2)                          | 63.4 (50.7 to 74.5)                 | 75.7 (65.3 to 84.2)               | <0.001          |
| Length of Stay, median (IQR), days   | 6.0 (3.2 to 10.1)                            | 5.6 (3.1 to 9.3)                    | 8.6 (4.6 to 13.4)                 | <0.001          |
| Gender                               |                                              |                                     |                                   | 0.019           |
| Male n (% of group)                  | 1,576 (49.0)                                 | 1,299 (48.1)                        | 277 (53.4)                        |                 |
| Female                               | 1,643 (51.0)                                 | 1,404 (51.9)                        | 239 (46.3)                        |                 |
| Race                                 |                                              |                                     |                                   | <0.001          |
| White                                | 1,277 (39.7)                                 | 1,022 (37.8)                        | 255 (49.4)                        |                 |
| Blacks                               | 1,713 (53.2)                                 | 1,482 (54.8)                        | 231 (44.7)                        |                 |
| Asian                                | 67 (2.1)                                     | 59 (2.1)                            | 8 (1.6)                           |                 |
| American Indian                      | 5 (0.2)                                      | 5 (0.2)                             | 0 (0.0)                           |                 |
| Pacific Islander                     | 2 (0.1)                                      | 2 (0.1)                             | 0 (0.0)                           |                 |
| Other                                | 155 (4.8)                                    | 133 (4.9)                           | 22 (4.3)                          |                 |
| Ethnicity                            |                                              |                                     |                                   | 0.253           |
| Arab or Middle Eastern               | 157 (4.9)                                    | 142 (5.3)                           | 15 (2.9)                          |                 |
| Hispanic or Latino                   | 82 (2.5)                                     | 69 (2.6)                            | 13 (2.5)                          |                 |
| Non-Hispanic                         | 2,776 (86.2)                                 | 2,319 (85.8)                        | 457 (88.6)                        |                 |
| Other                                | 170 (5.3)                                    | 146 (5.4)                           | 24 (4.7)                          |                 |
| Unavailable                          | 33 (1.0)                                     | 26 (1.0)                            | 7 (1.4)                           |                 |
| <b>Medical Condition</b>             |                                              |                                     |                                   |                 |
| Diabetes                             | 1,329 (41.3)                                 | 1,073 (39.7)                        | 256 (49.6)                        | <0.001          |
| Hypertension                         | 2,386 (74.1)                                 | 1,949 (72.1)                        | 437 (84.7)                        | <0.001          |
| Heart Failure                        | 609 (18.9)                                   | 440 (16.3)                          | 169 (32.8)                        | <0.001          |
| Heart Disease                        | 763 (23.7)                                   | 599 (22.2)                          | 204 (39.5)                        | <0.001          |
| Chronic Kidney Disease               | 1,299 (40.4)                                 | 929 (34.4)                          | 300 (58.1)                        | <0.001          |
| Asthma                               | 429 (13.3)                                   | 362 (13.4)                          | 67 (13.0)                         | 0.803           |
| COPD                                 | 568 (17.6)                                   | 428 (15.8)                          | 140 (27.1)                        | <0.001          |
| Obesity (BMI $\geq$ 30) <sup>a</sup> | 1,642 (51.0)                                 | 1,405 (52.0)                        | 237 (45.9)                        | 0.036           |
| Smoking <sup>b</sup>                 | 133 (4.1)                                    | 115 (4.3)                           | 18 (3.5)                          | <0.001          |
| <b>Health Insurance Payor</b>        |                                              |                                     |                                   |                 |
| Medicare                             | 1,808 (56.2)                                 | 1,393 (51.5)                        | 415 (80.4)                        | <0.001          |
| Medicaid                             | 460 (14.3)                                   | 429 (15.9)                          | 31 (6.0)                          |                 |

|                              |              |              |            |        |
|------------------------------|--------------|--------------|------------|--------|
| Commercial                   | 897 (27.9)   | 836 (30.9)   | 61 (11.8)  |        |
| Military                     | 7 (0.2)      | 5 (0.2)      | 2 (0.4)    |        |
| Exchange                     | 41 (1.3)     | 37 (1.4)     | 4 (0.8)    |        |
| Unknown                      | 6 (0.2)      | 3 (0.1)      | 3 (0.6)    |        |
|                              |              |              |            |        |
| <b>Home Medication</b>       |              |              |            |        |
| Aspirin                      | 1,354 (42.1) | 1,054 (39.0) | 300 (58.1) | <0.001 |
| ACE Inhibitor                | 940 (29.2)   | 757 (28.0)   | 183 (35.5) | 0.001  |
| Angiotensin Receptor Blocker | 676 (21.0)   | 533 (19.7)   | 143 (27.7) | <0.001 |
| Metformin                    | 688 (21.4)   | 565 (20.9)   | 123 (23.8) | 0.136  |
| Insulin                      | 490 (15.2)   | 377 (14.0)   | 113 (21.9) | <0.001 |
| Warfarin                     | 230 (7.1)    | 173 (6.4)    | 57 (11.1)  | <0.001 |
| NOAC                         | 347 (10.8)   | 271 (10.0)   | 76 (14.7)  | 0.002  |
| Inhaled Corticosteroid       | 472 (14.7)   | 367 (13.6)   | 105 (20.4) | <0.001 |
| LABA                         | 318 (9.9)    | 240 (8.9)    | 78 (15.1)  | <0.001 |
| LAMA                         | 197 (6.1)    | 150 (5.6)    | 47 (9.1)   | 0.002  |
|                              |              |              |            |        |
| <b>Hospital Medication</b>   |              |              |            |        |
| Hydroxychloroquine           | 2,496 (77.5) | 2,061 (76.3) | 435 (84.3) | <0.001 |
| Azithromycin                 | 2,463 (76.5) | 2,046 (75.7) | 417 (80.8) | 0.012  |
| Prophylactic Heparin         | 2,547 (79.1) | 2,136 (79.0) | 411 (79.7) | 0.748  |
| Therapeutic Heparin          | 1,257 (39.0) | 916 (33.9)   | 341 (67.0) | <0.001 |
| Tocilizumab                  | 30 (0.9)     | 18 (0.7)     | 12 (2.3)   | <0.001 |
| Remdesivir                   | 8 (0.2)      | 7 (0.3)      | 1 (0.2)    | 0.785  |
| Systemic corticosteroids     | 1,631 (50.7) | 1,265 (46.8) | 366 (70.9) | <0.001 |
| NOAC                         | 340 (10.6)   | 291 (10.8)   | 49 (9.5)   | 0.390  |
| Zinc                         | 1,596 (49.6) | 1,340 (49.6) | 256 (49.6) | 0.987  |
| Vitamin C                    | 794 (24.7)   | 637 (23.6)   | 157 (30.4) | 0.001  |
|                              |              |              |            |        |
| <b>Oxygen Therapy</b>        |              |              |            |        |
| High Flow O2                 | 848 (26.3)   | 534 (19.8)   | 314 (60.9) | <0.001 |
| BiPAP                        | 125 (3.9)    | 73 (2.7)     | 52 (10.1)  | <0.001 |
| CPAP                         | 93 (2.9)     | 59 (2.2)     | 34 (6.6)   | <0.001 |
| Nonrebreather Mask           | 867 (26.9)   | 537 (19.9)   | 330 (64.0) | <0.001 |
| Mechanical Ventilation       | 571 (17.7)   | 255 (9.4)    | 316 (61.2) | <0.001 |

Abbreviations: COVID-19, Coronavirus disease 2019; BMI, body mass index (calculated as weight in kilograms divided by height in meters squared); NOAC, Non-vitamin K oral anticoagulation; LABA, Long-acting beta-agonist; LAMA, Long acting muscarinic antagonist; BiPAP, Bilevel positive airway pressure; CPAP, Continuous positive airway pressure. <sup>a</sup> BMI data available for 3135 patients. <sup>b</sup> smoking data available for 2517 patients. \* P value for the difference between discharged alive and died in the hospital groups



**Table 2. Overall Mortality by Age Category of Discharged Patients who were Admitted with a COVID-19 Diagnosis**

| Age Category, years | Total Patients | Alive at Discharge, n (%) | Deceased, n (%) |
|---------------------|----------------|---------------------------|-----------------|
| <18                 | 8              | 7 (87.5)                  | 1 (12.5)        |
| 19-40               | 295            | 285 (96.6)                | 10 (3.4)        |
| 41-50               | 370            | 350 (94.6)                | 20 (5.4)        |
| 51-60               | 554            | 510 (92.1)                | 44 (7.9)        |
| 61-70               | 737            | 631 (85.6)                | 106 (14.4)      |
| 71-80               | 621            | 464 (74.7)                | 157 (25.3)      |
| >80                 | 634            | 456 (71.9)                | 178 (28.1)      |

**Table 3. Overall Mortality by Time of Admission for Patients who were Discharged During Study Period. N=3.219**

| Time Frame                 | Total Hospital Admissions | Discharged Alive (%) | Died in the Hospital (%) |
|----------------------------|---------------------------|----------------------|--------------------------|
| Pre-peak (3/13- 3/30/2020) | 1,447                     | 1,180 (81.5)         | 267 (18.5)               |
| Peak (3/31- 4/13/2020)     | 1,279                     | 1,083 (84.7)         | 196 (15.3)               |
| Post-peak (4/14-4/29/2020) | 493                       | 440 (89.2)           | 53 (10.8)                |

**Table 4. Odds Ratio of Death from Logistic Regression Model for In-hospital Treatment Medications when Controlling for Age, Gender, and Chronic Medical Conditions**

| Medication                | Odds Ratio of Death | Confidence Interval | P-Value |
|---------------------------|---------------------|---------------------|---------|
| Hydroxychloroquine        | 1.33                | 0.95 to 1.88        | 0.102   |
| Azithromycin              | 1.11                | 0.82 to 1.50        | 0.489   |
| Vitamin C                 | 1.40                | 1.08 to 1.81        | 0.011   |
| Zinc                      | 0.50                | 0.39 to 0.64        | <0.001  |
| Novel oral anticoagulants | 0.42                | 0.29 to 0.60        | <0.001  |
| Systemic corticosteroids  | 2.45                | 1.91 to 3.12        | <0.001  |
| Remdesivir <sup>a</sup>   | 2.22                | 0.18 to 27.5        | 0.535   |
| Tocilizumab <sup>b</sup>  | 2.23                | 0.99 to 5.02        | 0.052   |
| Prophylactic heparin      | 0.76                | 0.57 to 1.02        | 0.071   |
| Therapeutic heparin       | 3.06                | 2.44 to 3.83        | <0.001  |

<sup>a</sup> only 8 patients received Remdesivir. <sup>b</sup> only 30 patients received Tocilizumab

**Figure 1. Odds Ratio of Death from Logistic Regression Model when Controlling for Gender, Age, Race, Current Smoking, and Comorbidities.**

1  
2  
3 Ethics Statement:  
4

5 Study was approved by Beaumont IRB, Study ID: 2020-161  
6  
7  
8  
9

10 Funding Statement: this research received no grant from any funding agency in the public, commercial,  
11  
12 or not for profit sectors.  
13  
14  
15

16 Competing Interest: none declared by all authors.  
17  
18  
19  
20

21 Contributorship statement:  
22

23 EM contributed to design of the study, data interpretation, drafting the article, critical revision and final  
24  
25 approval of the manuscript  
26

27 AO contributed to design of the study, data interpretation, drafting the article, critical revision and final  
28  
29 approval of the manuscript  
30

31 DL contributed to design of the study, data analysis and interpretation, drafting the article, critical  
32  
33 revision and final approval of the manuscript  
34  
35

36  
37  
38  
39 The corresponding author attests that all listed authors meet authorship criteria and that no others  
40  
41 meeting the criteria have been omitted  
42

43 All authors declare no conflict of interest  
44  
45  
46  
47

48 Data sharing statement: study data are available upon reasonable request  
49  
50  
51  
52  
53  
54  
55  
56  
57  
58  
59  
60

## References:

1. Phelan, A.L., R. Katz, and L.O. Gostin, *The Novel Coronavirus Originating in Wuhan, China: Challenges for Global Health Governance*. JAMA, 2020.
2. Michigan.gov, C.M.D. accessed 6/1/2020]; Available from: [https://www.michigan.gov/coronavirus/0,9753,7-406-98163\\_98173---,00.html](https://www.michigan.gov/coronavirus/0,9753,7-406-98163_98173---,00.html)
3. Xie, J., et al., *Clinical Characteristics of Patients Who Died of Coronavirus Disease 2019 in China*. JAMA Netw Open, 2020. **3**(4): p. e205619.
4. Grasselli, G., et al., *Baseline Characteristics and Outcomes of 1591 Patients Infected With SARS-CoV-2 Admitted to ICUs of the Lombardy Region, Italy*. JAMA, 2020.
5. Richardson, S., et al., *Presenting Characteristics, Comorbidities, and Outcomes Among 5700 Patients Hospitalized With COVID-19 in the New York City Area*. JAMA, 2020.
6. Price-Haywood, E.G., et al., *Hospitalization and Mortality among Black Patients and White Patients with Covid-19*. N Engl J Med, 2020.
7. Suleyman, G., et al., *Clinical Characteristics and Morbidity Associated With Coronavirus Disease 2019 in a Series of Patients in Metropolitan Detroit*. JAMA Netw Open, 2020. **3**(6): p. e2012270.
8. Zhou, F., et al., *Clinical course and risk factors for mortality of adult inpatients with COVID-19 in Wuhan, China: a retrospective cohort study*. Lancet, 2020. **395**(10229): p. 1054-1062.
9. Petrilli, C.M., et al., *Factors associated with hospital admission and critical illness among 5279 people with coronavirus disease 2019 in New York City: prospective cohort study*. BMJ, 2020. **369**: p. m1966.
10. Garg S, K.L., Whitaker M, et al. , *Hospitalization Rates and Characteristics of Patients Hospitalized with Laboratory-Confirmed Coronavirus Disease 2019 — COVID-NET, 14 States, March 1–30, 2020*. MMWR Morb Mortal Wkly Rep, 2020. **2020**;**69**:**458–464**.
11. Yancy, C.W., *COVID-19 and African Americans*. JAMA, 2020.

- 1  
2  
3  
4  
5  
6  
7  
8  
9  
10  
11  
12  
13  
14  
15  
16  
17  
18  
19  
20  
21  
22  
23  
24  
25  
26  
27  
28  
29  
30  
31  
32  
33  
34  
35  
36  
37  
38  
39  
40  
41  
42  
43  
44  
45  
46  
47  
48  
49  
50  
51  
52  
53  
54  
55  
56  
57  
58  
59  
60
12. New York State Department of Health. COVID-19 fatalities. Updated May 31. Accessed June 1, 2020.]; Available from: <https://covid19tracker.health.ny.gov/views/NYS-COVID19-Tracker/NYSDOHCOVID-19Tracker-Fatalities?%3Aembed=yes&%3Atoolbar=no&%3Atabs=n>.
  13. lab, A.R. *The Color of Coronavirus*. 6/16/2020]; Available from: <https://www.apmresearchlab.org/covid/deaths-by-race#reporting>.
  14. Cummings, M.J., et al., *Epidemiology, clinical course, and outcomes of critically ill adults with COVID-19 in New York City: a prospective cohort study*. Lancet, 2020.
  15. Wu, Z. and J.M. McGoogan, *Characteristics of and Important Lessons From the Coronavirus Disease 2019 (COVID-19) Outbreak in China: Summary of a Report of 72314 Cases From the Chinese Center for Disease Control and Prevention*. JAMA, 2020.
  16. Sommerstein, R., et al., *Coronavirus Disease 2019 (COVID-19): Do Angiotensin-Converting Enzyme Inhibitors/Angiotensin Receptor Blockers Have a Biphasic Effect?* J Am Heart Assoc, 2020. **9**(7): p. e016509.
  17. Mackey, K., et al., *Risks and Impact of Angiotensin-Converting Enzyme Inhibitors or Angiotensin-Receptor Blockers on SARS-CoV-2 Infection in Adults*. Ann Intern Med, 2020.

Figure 1. Odds Ratio of Death from Logistic Regression Model when Controlling for Gender, Age, Race, Current Smoking, and Comorbidities.

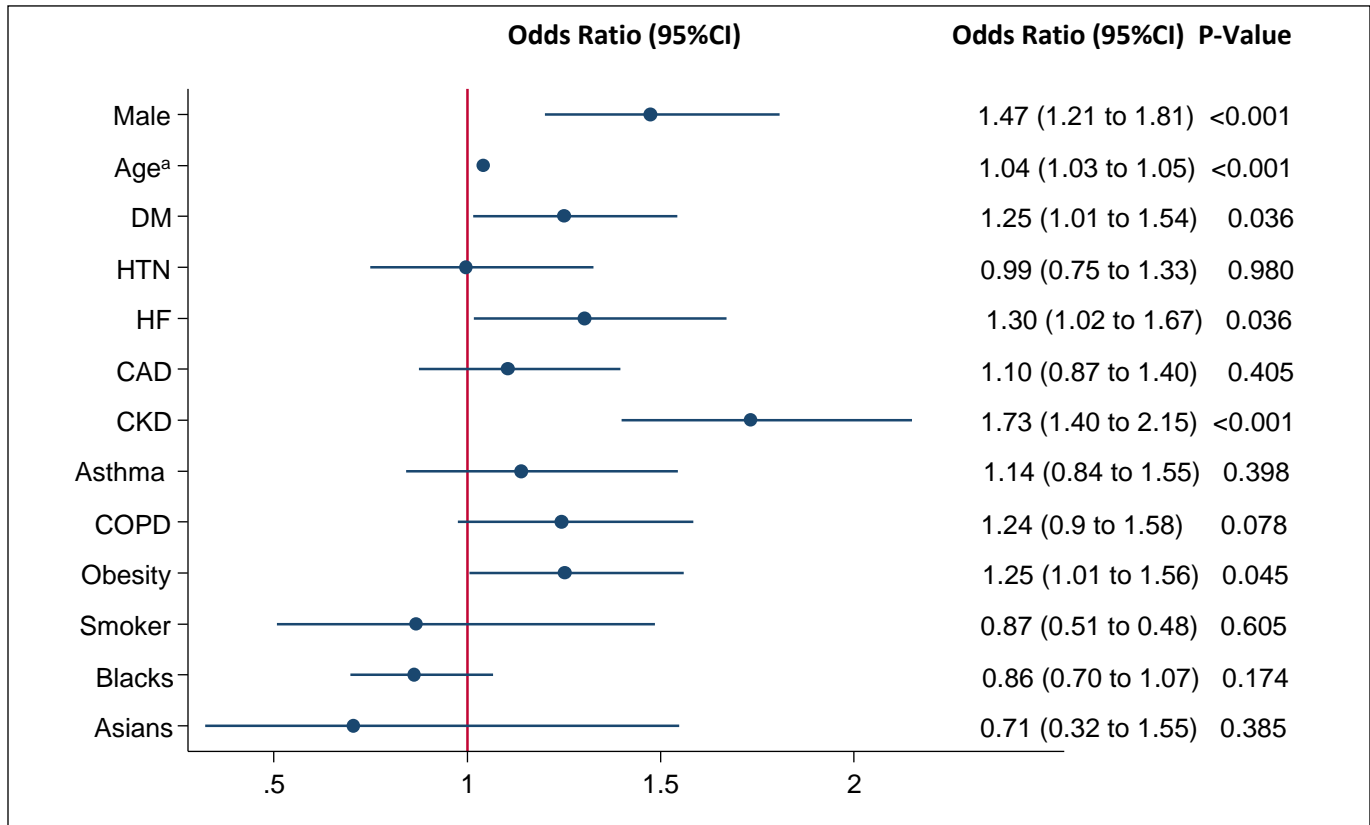

Abbreviations: DM, Diabetes Mellitus; HTN, hypertension; HF, heart failure; CAD, coronary artery disease; CKD, chronic kidney disease; COPD, chronic obstructive pulmonary disease. <sup>a</sup> Age: for every increase of one year in age

## Retrospective Case Cohort Study of 3219 Hospitalized Patients with COVID19 in Southeast Michigan

### Supplement

Four multivariate logistic regression models were created with death as the outcome of interest using age, gender, and chronic medical conditions and bivariate associations within the data. The first model calculated the odds ratio of death when controlling for age, gender, race, current smoking, diabetes mellitus (DM), hypertension (HTN), heart failure (HF), coronary artery disease (CAD), chronic kidney disease (CKD), obesity (BMI >30), asthma, and chronic obstructive pulmonary disease (COPD) . The second model used the same variables as the first model with the addition of ten home medications of interest (angiotensin converting enzyme inhibitors, angiotensin receptor blockers, aspirin, insulin, metformin, warfarin, novel oral anticoagulants, inhaled corticosteroids, inhaled long-acting muscarinic antagonists, and inhaled long-acting beta agonists). The third model used the same variables as the first model with the addition of ten hospital-administered medications of interest (hydroxychloroquine, azithromycin, vitamin C, novel oral anticoagulants, remdesevir, tocilizumab, subcutaneous prophylactic heparin, and therapeutic heparin). The fourth model used the same variables as the first model with the addition of use of hydroxychloroquine, azithromycin, and therapeutically dosed heparin as categorical variables based on time period. All variables were retained in the final models other than the fourth model where highly nonsignificant medical conditions were excluded to increase model stability.

**Table S1. Odds Ratio of Death from Logistic Regression Model with Home Medications when Controlling for Age, Gender, and Chronic Medical Conditions**

| Variable                     | Odds Ratio of Death | Confidence Interval | P-Value |
|------------------------------|---------------------|---------------------|---------|
| Male gender                  | 1.47                | 1.20 to 1.80        | <0.001  |
| Age (per year) <sup>a</sup>  | 1.04                | 1.03 to 1.05        | <0.001  |
| Diabetes                     | 1.18                | 0.90 to 1.54        | 0.229   |
| Hypertension                 | 0.99                | 0.73 to 1.33        | 0.922   |
| Heart Failure                | 1.32                | 1.03 to 1.70        | 0.031   |
| Coronary Artery Disease      | 1.08                | 0.85 to 1.37        | 0.62    |
| Chronic Kidney Disease       | 1.66                | 1.34 to 2.07        | <0.001  |
| Asthma                       | 1.13                | 0.81 to 1.56        | 0.475   |
| COPD                         | 1.23                | 0.93 to 1.61        | 0.137   |
| Ace Inhibitor                | 0.93                | 0.74 to 1.18        | 0.552   |
| Angiotensin Receptor Blocker | 1.01                | 0.80 to 1.29        | 0.906   |
| Aspirin                      | 1.16                | 0.92 to 1.48        | 0.214   |
| Insulin                      | 1.24                | 0.92 to 1.67        | 0.161   |
| Metformin                    | 0.98                | 0.73 to 1.31        | 0.884   |
| Warfarin                     | 1.05                | 0.74 to 1.48        | 0.785   |
| Novel Oral Anticoagulant     | 0.85                | 0.62 to 1.15        | 0.281   |
| Inhaled corticosteroid       | 0.86                | 0.54 to 1.35        | 0.500   |
| Heparin Post-peak            | 1.08                | 0.56 to 2.09        | 0.830   |
| LAMA                         | 0.85                | 0.54 to 1.34        | 0.487   |
| LABA                         | 1.45                | 0.87 to 2.41        | 0.157   |

Abbreviations: COPD, chronic obstructive pulmonary disease; LAMA, long-acting muscarinic antagonist; LABA, long-acting beta agonist <sup>a</sup> Age: for every increase of one year in age

**Table S2. Odds Ratio of Death from Logistic Regression Model with Administration of Azithromycin, Hydroxychloroquine, and Therapeutically Dosed Heparin in Three Time Periods when Controlling for Age, Gender, and Chronic Medical Conditions**

| Variable                     | Odds Ratio of Death | Confidence Interval | P-Value |
|------------------------------|---------------------|---------------------|---------|
| Male gender                  | 1.34                | 1.08 to 1.65        | 0.007   |
| Age <sup>a</sup>             | 1.05                | 1.04 to 1.06        | <0.001  |
| DM                           | 1.14                | 0.91 to 1.41        | 0.237   |
| Heart Failure                | 1.35                | 1.05 to 1.73        | 0.017   |
| CKD                          | 1.54                | 1.24 to 1.93        | <0.001  |
| COPD                         | 1.19                | 0.93 to 1.52        | 0.176   |
| Azithromycin Pre-peak        | 0.68                | 0.40 to 1.16        | 0.158   |
| Azithromycin Peak            | 0.89                | 0.58 to 1.34        | 0.568   |
| Azithromycin Post-peak       | 0.90                | 0.39 to 2.09        | 0.806   |
| Hydroxychloroquine Pre-peak  | 1.90                | 1.11 to 3.24        | 0.018   |
| Hydroxychloroquine Peak      | 0.71                | 0.46 to 1.09        | 0.118   |
| Hydroxychloroquine Post-peak | 0.69                | 0.34 to 1.32        | 0.246   |
| Heparin Pre-peak             | 3.41                | 2.47 to 4.70        | <0.001  |
| Heparin Peak                 | 2.99                | 2.20 to 4.08        | < 0.001 |
| Heparin Post-peak            | 1.08                | 0.56 to 2.09        | 0.830   |

Abbreviations: DM, Diabetes Mellitus; CKD, chronic kidney disease; COPD, chronic obstructive pulmonary disease. a Age: for every increase of one year in age



STROBE Statement—Checklist of items that should be included in reports of *cohort studies*

|                              | Item No | Recommendation                                                                                                                                                                                                                                                                                                         | Page No         |
|------------------------------|---------|------------------------------------------------------------------------------------------------------------------------------------------------------------------------------------------------------------------------------------------------------------------------------------------------------------------------|-----------------|
| <b>Title and abstract</b>    | 1       | (a) Indicate the study's design with a commonly used term in the title or the abstract<br>(b) Provide in the abstract an informative and balanced summary of what was done and what was found                                                                                                                          | 3: 5<br>3:2-4:5 |
| <b>Introduction</b>          |         |                                                                                                                                                                                                                                                                                                                        |                 |
| Background/rationale         | 2       | Explain the scientific background and rationale for the investigation being reported                                                                                                                                                                                                                                   | 6:7-6:16        |
| Objectives                   | 3       | State specific objectives, including any prespecified hypotheses                                                                                                                                                                                                                                                       | 6:10-6:16       |
| <b>Methods</b>               |         |                                                                                                                                                                                                                                                                                                                        |                 |
| Study design                 | 4       | Present key elements of study design early in the paper                                                                                                                                                                                                                                                                | 6:20-8:2        |
| Setting                      | 5       | Describe the setting, locations, and relevant dates, including periods of recruitment, exposure, follow-up, and data collection                                                                                                                                                                                        | 6:18-7:18       |
| Participants                 | 6       | (a) Give the eligibility criteria, and the sources and methods of selection of participants. Describe methods of follow-up<br>(b) For matched studies, give matching criteria and number of exposed and unexposed                                                                                                      | 6:20-7:22       |
| Variables                    | 7       | Clearly define all outcomes, exposures, predictors, potential confounders, and effect modifiers. Give diagnostic criteria, if applicable                                                                                                                                                                               | 7:1-8:1         |
| Data sources/<br>measurement | 8*      | For each variable of interest, give sources of data and details of methods of assessment (measurement). Describe comparability of assessment methods if there is more than one group                                                                                                                                   |                 |
| Bias                         | 9       | Describe any efforts to address potential sources of bias                                                                                                                                                                                                                                                              |                 |
| Study size                   | 10      | Explain how the study size was arrived at                                                                                                                                                                                                                                                                              | 6:20-6:22       |
| Quantitative variables       | 11      | Explain how quantitative variables were handled in the analyses. If applicable, describe which groupings were chosen and why                                                                                                                                                                                           |                 |
| Statistical methods          | 12      | (a) Describe all statistical methods, including those used to control for confounding<br>(b) Describe any methods used to examine subgroups and interactions<br>(c) Explain how missing data were addressed<br>(d) If applicable, explain how loss to follow-up was addressed<br>(e) Describe any sensitivity analyses |                 |
| <b>Results</b>               |         |                                                                                                                                                                                                                                                                                                                        |                 |
| Participants                 | 13*     | (a) Report numbers of individuals at each stage of study—eg numbers potentially eligible, examined for eligibility, confirmed eligible, included in the study, completing follow-up, and analysed<br>(b) Give reasons for non-participation at each stage<br>(c) Consider use of a flow diagram                        |                 |
| Descriptive data             | 14*     | (a) Give characteristics of study participants (eg demographic, clinical, social) and information on exposures and potential confounders<br>(b) Indicate number of participants with missing data for each variable of interest<br>(c) Summarise follow-up time (eg, average and total amount)                         |                 |
| Outcome data                 | 15*     | Report numbers of outcome events or summary measures over time                                                                                                                                                                                                                                                         |                 |

|    |                          |    |                                                                                                                                                                                                              |                        |
|----|--------------------------|----|--------------------------------------------------------------------------------------------------------------------------------------------------------------------------------------------------------------|------------------------|
| 1  | Main results             | 16 | (a) Give unadjusted estimates and, if applicable, confounder-adjusted estimates and their precision (eg, 95% confidence interval). Make clear which confounders were adjusted for and why they were included |                        |
| 2  |                          |    | (b) Report category boundaries when continuous variables were categorized                                                                                                                                    |                        |
| 3  |                          |    | (c) If relevant, consider translating estimates of relative risk into absolute risk for a meaningful time period                                                                                             |                        |
| 4  |                          |    |                                                                                                                                                                                                              |                        |
| 5  |                          |    |                                                                                                                                                                                                              |                        |
| 6  |                          |    |                                                                                                                                                                                                              |                        |
| 7  |                          |    |                                                                                                                                                                                                              |                        |
| 8  |                          |    |                                                                                                                                                                                                              |                        |
| 9  | Other analyses           | 17 | Report other analyses done—eg analyses of subgroups and interactions, and sensitivity analyses                                                                                                               |                        |
| 10 |                          |    |                                                                                                                                                                                                              |                        |
| 11 | <b>Discussion</b>        |    |                                                                                                                                                                                                              |                        |
| 12 |                          |    |                                                                                                                                                                                                              |                        |
| 13 | Key results              | 18 | Summarise key results with reference to study objectives                                                                                                                                                     |                        |
| 14 | Limitations              | 19 | Discuss limitations of the study, taking into account sources of potential bias or imprecision. Discuss both direction and magnitude of any potential bias                                                   | 9:14-17;<br>13:23-14:6 |
| 15 |                          |    |                                                                                                                                                                                                              |                        |
| 16 | Interpretation           | 20 | Give a cautious overall interpretation of results considering objectives, limitations, multiplicity of analyses, results from similar studies, and other relevant evidence                                   | 11:5-13:22             |
| 17 |                          |    |                                                                                                                                                                                                              |                        |
| 18 |                          |    |                                                                                                                                                                                                              |                        |
| 19 | Generalisability         | 21 | Discuss the generalisability (external validity) of the study results                                                                                                                                        |                        |
| 20 |                          |    |                                                                                                                                                                                                              |                        |
| 21 | <b>Other information</b> |    |                                                                                                                                                                                                              |                        |
| 22 | Funding                  | 22 | Give the source of funding and the role of the funders for the present study and, if applicable, for the original study on which the present article is based                                                |                        |
| 23 |                          |    |                                                                                                                                                                                                              |                        |
| 24 |                          |    |                                                                                                                                                                                                              |                        |

\*Give information separately for exposed and unexposed groups.

**Note:** An Explanation and Elaboration article discusses each checklist item and gives methodological background and published examples of transparent reporting. The STROBE checklist is best used in conjunction with this article (freely available on the Web sites of PLoS Medicine at <http://www.plosmedicine.org/>, Annals of Internal Medicine at <http://www.annals.org/>, and Epidemiology at <http://www.epidem.com/>). Information on the STROBE Initiative is available at <http://www.strobe-statement.org>.
