# Supplementary material for: 3219 hospitalised patients with COVID-19 in Southeast Michigan: a retrospective case cohort study
Source: PubMed Central journal article supplement — BMJ Open. 2021 Apr 7;11(4):e042042. doi: 10.1136/bmjopen-2020-042042 (PMC8029036; doi:10.1136/bmjopen-2020-042042), 2021-04-07
Supplement: bmjopen-2020-042042supp001.pdf [file bmjopen-2020-042042supp001.pdf]

**Retrospective Case Cohort Study of 3219 Hospitalized Patients with COVID19 in Southeast Michigan**

## Supplement

Four multivariate logistic regression models were created with death as the outcome of interest using age, gender, and chronic medical conditions and bivariate associations within the data. The first model calculated the odds ratio of death when controlling for age, gender, race, current smoking, diabetes mellitus (DM), hypertension (HTN), heart failure (HF), coronary artery disease (CAD), chronic kidney disease (CKD), obesity (BMI >30), asthma, and chronic obstructive pulmonary disease (COPD). The second model used the same variables as the first model with the addition of ten home medications of interest (angiotensin converting enzyme inhibitors, angiotensin receptor blockers, aspirin, insulin, metformin, warfarin, novel oral anticoagulants, inhaled corticosteroids, inhaled long-acting muscarinic antagonists, and inhaled long-acting beta agonists). The third model used the same variables as the first model with the addition of ten hospital-administered medications of interest (hydroxychloroquine, azithromycin, vitamin C, novel oral anticoagulants, remdesivir, tocilizumab, subcutaneous prophylactic heparin, and therapeutic heparin). The fourth model used the same variables as the first model with the addition of use of hydroxychloroquine, azithromycin, and therapeutically dosed heparin as categorical variables based on time period. All variables were retained in the final models other than the fourth model where highly nonsignificant medical conditions were excluded to increase model stability.

**Table S1. Odds Ratio of Death from Logistic Regression Model with Home Medications when Controlling for Age, Gender, and Chronic Medical Conditions**

| Variable                     | Odds Ratio of Death | Confidence Interval | P-Value |
|------------------------------|---------------------|---------------------|---------|
| <u>Male gender</u>           | 1.47                | 1.20 to 1.80        | <0.001  |
| Age (per year) <sup>a</sup>  | 1.04                | 1.03 to 1.05        | <0.001  |
| Diabetes                     | 1.18                | 0.90 to 1.54        | 0.229   |
| Hypertension                 | 0.99                | 0.73 to 1.33        | 0.922   |
| Heart Failure                | 1.32                | 1.03 to 1.70        | 0.031   |
| Coronary Artery Disease      | 1.08                | 0.85 to 1.37        | 0.62    |
| Chronic Kidney Disease       | 1.66                | 1.34 to 2.07        | <0.001  |
| Asthma                       | 1.13                | 0.81 to 1.56        | 0.475   |
| COPD                         | 1.23                | 0.93 to 1.61        | 0.137   |
| Ace Inhibitor                | 0.93                | 0.74 to 1.18        | 0.552   |
| Angiotensin Receptor Blocker | 1.01                | 0.80 to 1.29        | 0.906   |
| Aspirin                      | 1.16                | 0.92 to 1.48        | 0.214   |
| Insulin                      | 1.24                | 0.92 to 1.67        | 0.161   |
| Metformin                    | 0.98                | 0.73 to 1.31        | 0.884   |
| Warfarin                     | 1.05                | 0.74 to 1.48        | 0.785   |
| Novel Oral Anticoagulant     | 0.85                | 0.62 to 1.15        | 0.281   |
| Inhaled corticosteroid       | 0.86                | 0.54 to 1.35        | 0.500   |
| Heparin Post-peak            | 1.08                | 0.56 to 2.09        | 0.830   |
| LAMA                         | 0.85                | 0.54 to 1.34        | 0.487   |
| LABA                         | 1.45                | 0.87 to 2.41        | 0.157   |

Abbreviations: COPD, chronic obstructive pulmonary disease; LAMA, long-acting muscarinic antagonist; LABA, long-acting beta agonist <sup>a</sup> Age: for every increase of one year in age

**Table S2. Odds Ratio of Death from Logistic Regression Model with Administration of Azithromycin, Hydroxychloroquine, and Therapeutically Dosed Heparin in Three Time Periods when Controlling for Age, Gender, and Chronic Medical Conditions**

| Variable                     | Odds Ratio of Death | Confidence Interval | P-Value |
|------------------------------|---------------------|---------------------|---------|
| <u>Male gender</u>           | 1.34                | 1.08 to 1.65        | 0.007   |
| Age <sup>a</sup>             | 1.05                | 1.04 to 1.06        | <0.001  |
| DM                           | 1.14                | 0.91 to 1.41        | 0.237   |
| Heart Failure                | 1.35                | 1.05 to 1.73        | 0.017   |
| CKD                          | 1.54                | 1.24 to 1.93        | <0.001  |
| COPD                         | 1.19                | 0.93 to 1.52        | 0.176   |
| Azithromycin Pre-peak        | 0.68                | 0.40 to 1.16        | 0.158   |
| Azithromycin Peak            | 0.89                | 0.58 to 1.34        | 0.568   |
| Azithromycin Post-peak       | 0.90                | 0.39 to 2.09        | 0.806   |
| Hydroxychloroquine Pre-peak  | 1.90                | 1.11 to 3.24        | 0.018   |
| Hydroxychloroquine Peak      | 0.71                | 0.46 to 1.09        | 0.118   |
| Hydroxychloroquine Post-peak | 0.69                | 0.34 to 1.32        | 0.246   |
| Heparin Pre-peak             | 3.41                | 2.47 to 4.70        | <0.001  |
| Heparin Peak                 | 2.99                | 2.20 to 4.08        | < 0.001 |
| Heparin Post-peak            | 1.08                | 0.56 to 2.09        | 0.830   |

Abbreviations: DM, Diabetes Mellitus; CKD, chronic kidney disease; COPD, chronic obstructive pulmonary disease. a Age: for every increase of one year in age
